# Supplementary material for: High-yielding and facile synthesis of organosilicon compounds containing a m-carboranylmethyl group
Source: Royal Society of Chemistry journal article supplement (doi:10.1039/c5ra13344k), 2015-01-01

**Supplementary Information for**

**High-yielding and Facile Synthesis of Organosilicon Compounds  
containing *m*-Carboranylmethyl Group**

Xiao-Jie Han, Hua-Feng Fei, Bo-Zheng Liu, Yong-Xia Tan, Xue-Zhong Zhang, Ze-Min Xie,  
and Zhi-Jie Zhang\*

Laboratory of Advanced Polymer Materials, Institute of Chemistry Chinese Academy  
of Sciences Zhongguancun North First Street 2, 100190 Beijing (China)

College of Chemistry and Chemical Engineering, University of Chinese Academy of  
Sciences, No.19A Yuquan Road, Beijing 100049 (China)

Table of contents

|                               |    |
|-------------------------------|----|
| 1. General.....               | S2 |
| 2. Experimental section ..... | S3 |
| 3. references .....           | S7 |
| 4. NMR Spectra .....          | S8 |

## 1. General

All moisture sensitive reactions were carried out in flame-dried glassware under nitrogen atmosphere. The solvents used were purified by distillation over the drying agents indicated and were transferred under nitrogen: Et<sub>2</sub>O (Na), THF (Na), THP (Na), CH<sub>2</sub>Cl<sub>2</sub> (CaH<sub>2</sub>). All reactions were monitored by thin-layer chromatography (TLC) on gel F<sub>254</sub> plates using UV light as visualizing agent (if applicable), and a solution of Palladium chloride (0.01 g/L) in 5% aqueous hydrochloric acid (followed by heating as developing agents).

<sup>1</sup>H NMR and <sup>13</sup>C NMR were recorded in CDCl<sub>3</sub> solution on a AVANCE 400 spectrometer, <sup>29</sup>Si NMR and <sup>11</sup>B NMR spectra were recorded in CDCl<sub>3</sub> solution on a Bruker AVIII 500WB respectively. Chemical shifts were denoted in ppm (δ), and calibrated by using residual undeuterated solvent (CHCl<sub>3</sub> (7.26 ppm), DMSO-d<sub>5</sub> (2.50 ppm)) as internal reference for <sup>1</sup>H NMR and the deuterated solvent (CDCl<sub>3</sub> (77.00 ppm) or DMSO-d<sub>6</sub> (39.51 ppm)) <sup>13</sup>C NMR, to external BF<sub>3</sub>·OEt<sub>2</sub> (0.00 ppm) for boron chemical shifts and to external Si(Me)<sub>4</sub> for silicon chemical shifts. The following abbreviations were used to explain the multiplicities: s = singlet, d = doublet, br = broad, m = multiplet. High-resolution mass spectral analysis (HRMS) data were measured on a Bruker ApexII mass spectrometer by means of the FAB technique or Waters GCT by means of the EI technique or Bruker solarix XR by means of the ESI technique. IR spectra were recorded on a Bruker TENSOR-27 FT-IR spectrometer. The X-ray single-crystal determination was performed on a Rigaku RAXIS RAPID IP X-ray single crystal diffractometer. GC was carried out on a SHIMADZU GC-2010. Melting point was afforded by EXSTAR6000 DSC6220.

Compounds (chloromethyl)(4-methoxyphenyl)dimethylsilane<sup>1</sup> and (chloromethyl)dimethyl(phenyl)silane were prepared according to literature method.<sup>2</sup> All other chemicals were purchased from Beijing J&K Scientific.

## 2. Experimental section

### 2.1 Preparation of 1,7-bis(phenyl(dimethyl)silylmethyl)-*m*-carborane 1

To a solution of *n*-BuLi (2.5 M solution in *n*-hexane, 4.4 mL, 11 mmol) in dry solvent\* (10 mL) was added a solution of *m*-carborane (0.72 g, 5 mmol) in solvent (10 mL). The mixture was stirred at room temperature under nitrogen for 6 h. Following (chloromethyl)dimethyl(phenyl)silane (2.03 g, 11 mmol) was added in one portion, the mixture was refluxed for 10 h. The reaction was quenched with water and the mixture was extracted with ether, the combined extracts were washed with brine and dried over Na<sub>2</sub>SO<sub>4</sub>. The solvent was removed under reduced pressure, and the yields were identified by GC.

\*Solvent: THF, DE, Dioxane, DME, PhOMe, THP.

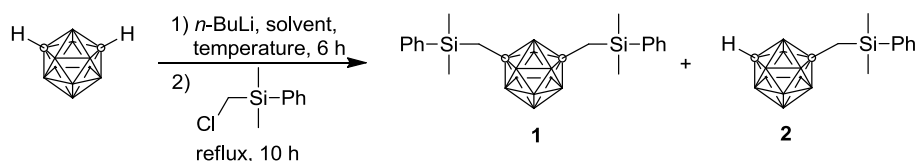

**Scheme 1:** Preparation of 1,7-bis(phenyl(dimethyl)silylmethyl)-*m*-carborane 1

### 2.2 Preparation of 1,7-bis(4-methoxyphenyl(dimethyl)silylmethyl)-*m*-carborane 3

To a solution of *n*-BuLi (2.5 M solution in *n*-hexane, 8.8 mL, 22 mmol) in dry THP (20 mL) was added a solution of *m*-carborane (1.44 g, 10 mmol) in THP (20 mL). The mixture was vigorously stirred at room temperature under nitrogen atmosphere for 1 h (screen was listed in Table S2). Following (chloromethyl)(4-methoxyphenyl)dimethylsilane (4.40 g, 20.5 mmol) was added in one portion, the mixture was refluxed for 10 h. The reaction was quenched with water and the mixture was extracted with ether. The combined extracts were washed with brine and dried over Na<sub>2</sub>SO<sub>4</sub>. The solvent was removed under reduced pressure, and the residue was purified by recrystallization (from *n*-hexane) to afford white solid 1,7-bis(4-methoxyphenyl(dimethyl)silylmethyl)-*m*-carborane 3 (2.50 g, 50% isolated yield).

To the solution of the crude product after recrystallization dissolved in dry THP (20 mL) was added a solution of *n*-BuLi (2.5 M solution in *n*-hexane, 1 mL, 2.5 mmol). The mixture was vigorously stirred at room temperature under nitrogen atmosphere for 1 h. Following (chloromethyl)(4-methoxyphenyl)dimethylsilane (0.54 g, 2.5 mmol) was added in one portion. After refluxing for 10 h, the reaction was quenched with water and the mixture was extracted with ether. The combined extracts were washed with brine and dried over Na<sub>2</sub>SO<sub>4</sub>. The solvent was removed under reduced pressure, and the residue was purified by recrystallization (from *n*-hexane) to afford 3 2.1 g. The overall yield of 3 was 88%.

<sup>1</sup>H NMR (400 MHz, CDCl<sub>3</sub>): δ 7.42-7.40 (d, J=8Hz, 2H, C6H4), 6.96-6.94 (d, J=8Hz, 2H), 3.85 (s, 6H), 3.5-1.3 (br, 10H), 1.67 (s, 4H), 0.36 ppm (s, 12H). <sup>13</sup>C NMR (400 MHz, CDCl<sub>3</sub>): δ 74.2, 25.3, -3.8 ppm. <sup>29</sup>Si NMR (500MHz, CDCl<sub>3</sub>): -4.52 ppm. <sup>11</sup>B NMR (500 MHz, CDCl<sub>3</sub>): δ -7.05, -10.03, -10.76 ppm. IR: ν =2608, 1595, 1502, 1278, 1250, 1112, 1029, 829, cm<sup>-1</sup>. HRMS (FAB): *m/z* calcd for C<sub>22</sub>H<sub>40</sub>B<sub>10</sub>Si<sub>2</sub>O<sub>2</sub> [M+1]<sup>+</sup>: 500.3556. Found: 500.3578. Mp 78.9 °C

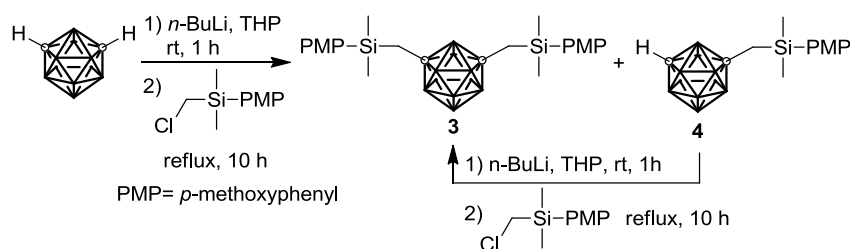

**Scheme 2:** Preparation of 1,7-bis(4-methoxyphenyl(dimethyl)silylmethyl)-*m*-carborane **3**

### 2.3 Preparation of 1,7-bis(hydroxy(dimethyl)silylmethyl)-*m*-carborane **6**

To a solution of **3** (1 g, 2 mmol) in dry  $\text{CH}_2\text{Cl}_2$  (30 mL) was added dropwise a solution of bromine (0.8 g, 5 mmol) in dry  $\text{CH}_2\text{Cl}_2$  (30 mL) (10 mL). The reaction mixture was stirred at  $0^\circ\text{C}$  for 30 min; then warmed to room temperature for 10 h. Intermediate **5** was obtained after removing  $\text{CH}_2\text{Cl}_2$  under reduced pressure. Subsequently, the obtained orange oily liquid **5** was dissolved in anhydrous ether (20 mL) under nitrogen atmosphere. After that, the orange solution was injected to a solution of  $\text{H}_2\text{O}$  (0.144 mL, 8 mmol) and  $\text{Et}_3\text{N}$  (2.8 mL, 20 mmol) in ether (100 mL) by nitrogen through double-tipped needle at  $-15^\circ\text{C}$  with vigorous stirring. At the moment, mass of white solid was precipitated immediately. Following the mixture was stirred for another 10 min and filtrated, the filtrate was condensed and recrystallized to afford the expected hydrolysed product 1,7-bis(hydroxy(dimethyl)silylmethyl)-*m*-carborane **6** (0.64g, quantitative) as white solid.

**5:**  $^{29}\text{Si}$  NMR (300MHz,  $\text{CH}_2\text{Cl}_2$ ): 21.36 ppm.<sup>a</sup>

**6:**  $^1\text{H}$  NMR (400 MHz,  $\text{D}_6\text{-DMSO}$ ):  $\delta$  5.62 (s, 2H), 3.75-1.25 (br, 10H), 1.51 (s, 4H), 0.10 ppm (s, 12H).  $^{13}\text{C}$  NMR (400 MHz,  $\text{CDCl}_3$ ):  $\delta$  74.0, 28.7, -0.9 ppm.  $^{29}\text{Si}$  NMR (500MHz,  $\text{CDCl}_3$ ): 9.51 ppm.  $^{11}\text{B}$  NMR (500 MHz,  $\text{CDCl}_3$ ):  $\delta$  -1.06, -2.03, -3.97, -5.00, -5.93, -6.40 ppm. IR:  $\nu$  = 3331, 2605, 1259, 1216, 1026, 871, 837, 779  $\text{cm}^{-1}$ . HRMS (ESI):  $m/z$  calcd for  $\text{C}_8\text{H}_{28}\text{B}_{10}\text{O}_2\text{Si}_2$   $[\text{M}+\text{Na}]^+$ : 343.2529. Found: 343.2532. Mp  $133.5^\circ\text{C}$ .

<sup>a</sup> **5** was very sensitive to moisture,  $^1\text{H}$  and  $^{13}\text{C}$  NMR were afforded with difficulty.

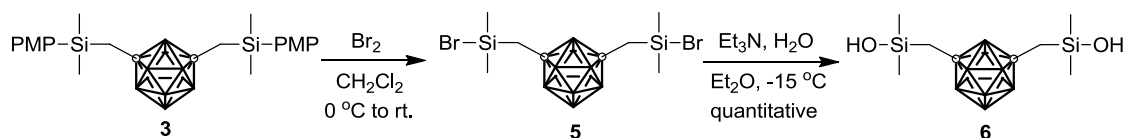

**Scheme 3:** Preparation of 1,7-bis(hydroxy(dimethyl)silylmethyl)-*m*-carborane **6**

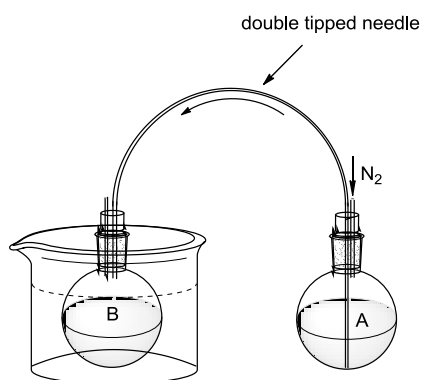

A: solution of **3** in  $\text{Et}_2\text{O}$

B: solution of  $\text{H}_2\text{O}$  and  $\text{Et}_3\text{N}$  in  $\text{Et}_2\text{O}$  at  $-15^\circ\text{C}$

**Fig. 1:** The sketch of hydrolysis **5**

## 2.4 Preparation of 1,7-bis(dimethylsilylmethyl)-*m*-carborane 7

To a solution of **3** (1 g, 2 mmol) in dry CH<sub>2</sub>Cl<sub>2</sub> (30 mL) was added dropwise a solution of bromine (0.8 g, 5 mmol) in dry CH<sub>2</sub>Cl<sub>2</sub> (10 mL). The reaction mixture was stirred at 0 °C for 30 min; then warmed to room temperature for 10 h. Intermediate **5** was obtained after removing CH<sub>2</sub>Cl<sub>2</sub> under reduced pressure. Subsequently, the obtained orange oily liquid **5** was dissolved in THF (20 mL) under nitrogen atmosphere. The LiAlH<sub>4</sub> (2.4 M solution in THF, 2 mL, 4.8 mmol) was dropped to the orange solution at 0 °C with vigorous stirring. Following the mixture was stirred for another 10 min, the reaction was quenched by dropwise adding HCl (0.5 M, 20 mL). The mixture was extracted with Et<sub>2</sub>O and the combined extract was condensed under reduced pressure, the orange residue was purified by filtration with column chromatography. The expected reduction product 1,7-bis(dimethylsilylmethyl)-*m*-carborane **7** (0.57 g, quantitative) was afforded as colourless liquid.

<sup>1</sup>H NMR (400 MHz, CDCl<sub>3</sub>): δ 3.99-3.90 (m, 2H), 3.50-1.20 (br, 10H), 1.52-1.51 (d, J=4Hz, 4H), 0.13-0.12 ppm (d, J=4Hz, 12H). <sup>13</sup>C NMR (400 MHz, CDCl<sub>3</sub>): δ 74.2, 25.4, -3.8 ppm. <sup>29</sup>Si NMR (500MHz, CDCl<sub>3</sub>): -14.54 ppm. <sup>11</sup>B NMR (500 MHz, CDCl<sub>3</sub>): δ -6.29, -7.26, -9.31, -9.86, -10.31, -10.77, -12.06 ppm. IR: ν =2959, 2597, 2138, 1254, 1027, 884, 841, 742 cm<sup>-1</sup>. HRMS (EI): *m/z* calcd for C<sub>8</sub>H<sub>28</sub>B<sub>10</sub>Si<sub>2</sub> [M-1]<sup>+</sup>: 287.2733. Found: 287.2653. n<sub>D</sub><sup>25</sup>: 1.5235.

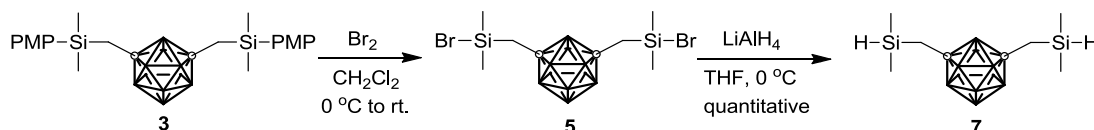

Scheme 4: Preparation of 1,7-bis(dimethylsilylmethyl)-*m*-carborane 7

## 2.5 Preparation of 1,7-bis(vinyl(dimethyl)silylmethyl)-*m*-carborane 8

To a solution of **3** (1 g, 2 mmol) in dry CH<sub>2</sub>Cl<sub>2</sub> (30 mL) was added dropwise a solution of bromine (0.8 g, 5 mmol) in dry CH<sub>2</sub>Cl<sub>2</sub> (10 mL). The reaction mixture was stirred at 0 °C for 30 min; then warmed to room temperature for 10 h. Intermediate **5** was obtained after removing CH<sub>2</sub>Cl<sub>2</sub> under reduced pressure. Subsequently, the obtained orange oily liquid **5** was dissolved in THF (20 mL) under nitrogen atmosphere. The BrMgvinyl (1 M solution in THF, 4.2 mL, 4.2 mmol) was dropped to the orange solution at 0 °C with vigorous stirring. Following the mixture was stirred for another 30 min, the reaction was quenched by water. The mixture was extracted with Et<sub>2</sub>O and the combined extract was condensed under reduced pressure, the orange residue was purified by filtration with column chromatography. The expected reduction product 1,7-bis(vinyl(dimethyl)silylmethyl)-*m*-carborane **8** (0.59g, 88%) was afforded as colourless liquid.

<sup>1</sup>H NMR (300 MHz, CDCl<sub>3</sub>): δ 6.20-5.96 (m, 4H), 5.73-5.65 (dd, J=3Hz, 21Hz), 3.50-1.20 (br, 10H), 1.54 (s, 4H), 0.16 ppm (s, 12H). <sup>13</sup>C NMR (300 MHz, CDCl<sub>3</sub>): δ 137.6, 132.6, 74.1, 27.1, -2.6 ppm. <sup>29</sup>Si NMR (500MHz, CDCl<sub>3</sub>): -6.2 ppm. <sup>11</sup>B NMR (500 MHz, CDCl<sub>3</sub>): δ -6.01, -6.09, -9.12, -9.66, -10.14, -10.57, -11.72 ppm. IR: ν =2955, 2597, 1405, 1254, 1028, 952, 836, 779 cm<sup>-1</sup>. HRMS (EI): *m/z* calcd for C<sub>12</sub>H<sub>32</sub>B<sub>10</sub>Si<sub>2</sub> [M-1]<sup>+</sup>: 339.3046. Found: 339.2963. n<sub>D</sub><sup>25</sup>: 1.5218.

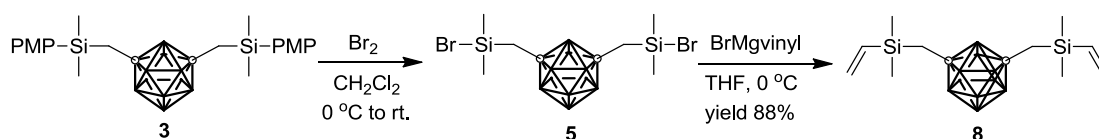

Scheme 5: Preparation of 1,7-bis(vinyl(dimethyl)silylmethyl)-*m*-carborane 8

## 2.6 Preparation of 1,7-bis(ethynyl(dimethyl)silylmethyl)-*m*-carborane 9

To a solution of **3** (1 g, 2 mmol) in dry CH<sub>2</sub>Cl<sub>2</sub> (30 mL) was added dropwise a solution of bromine (0.8 g, 5 mmol) in dry CH<sub>2</sub>Cl<sub>2</sub> (10 mL). The reaction mixture was stirred at 0 °C for 30 min; then warmed to room temperature for 10 h. Intermediate **5** was obtained after removing CH<sub>2</sub>Cl<sub>2</sub> under reduced pressure. Subsequently, the obtained orange oily liquid **5** was dissolved in THF (20 mL) under nitrogen atmosphere. The BrMgethynyl (0.5 M solution in THF, 8.4 mL, 4.2 mmol) was dropped to the orange solution at 0 °C with vigorous stirring. Following the mixture was stirred for another 30 min, the reaction was quenched by water. The mixture was extracted with Et<sub>2</sub>O and the combined extract was condensed under reduced pressure, the orange residue was purified by filtration with column chromatography. The expected reduction product 1,7-bis(ethynyl(dimethyl)silylmethyl)-*m*-carborane **9** (0.61g, 91%) was afforded as colourless liquid.

<sup>1</sup>H NMR (300 MHz, CDCl<sub>3</sub>): δ 3.50-1.20 (br, 10H), 2.42 (s, 2H), 1.63 (s, 4H), 0.26 ppm (s, 12H). <sup>13</sup>C NMR (300 MHz, CDCl<sub>3</sub>): δ 94.8, 87.8, 73.5, 26.9, -1.1 ppm. <sup>29</sup>Si NMR (500MHz, CDCl<sub>3</sub>): -17.51 ppm. <sup>11</sup>B NMR (500 MHz, CDCl<sub>3</sub>): δ -6.18, -7.15, -9.20, -9.81, -10.20, -10.64, -11.72 ppm. IR: ν = 3287, 2600, 2037, 1257, 1028, 844, 783, 680 cm<sup>-1</sup>. HRMS (EI): *m/z* calcd for C<sub>12</sub>H<sub>28</sub>B<sub>10</sub>Si<sub>2</sub> [M-1]<sup>+</sup>: 335.2733. Found: 335.2643. n<sub>D</sub><sup>25</sup>: 1.5710

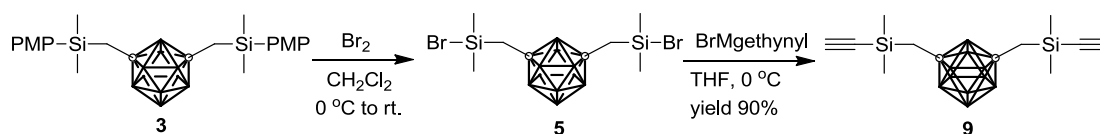

**Scheme 6:** Preparation of 1,7-bis(ethynyl(dimethyl)silylmethyl)-*m*-carborane **9**

### 3. references

- 1) (a) D. M. Knauss, H. A. Al-Muallem, T. Huang and D. T. Wu, *Macromolecules*, 2000, **33**, 3557-3568; (b) K. Murakami, H. Yorimitsu and K. Oshima, *J. Org. Chem.* 2009, **74**, 1415-1417; (c) K. Murakami, H. Yorimitsu and K. Oshima, *Org. Synth*, 2010, **87**, 178-183.
- 2) (a) I. P. Yakovlev, Y. S. Finogenov, V. A. Gindin, V. P. Feshin, P. A. Nikitin, A. E. Shchegolev and B. A. Ivin, *Zhurnal Obshchei Khimii*, 1985, **55**, 1093-1099; (b) D. Takeda, R. Oyama, and S. Yamada, *Chem. Lett.*, 2009, **38**, 532-533.

#### 4. NMR Spectra

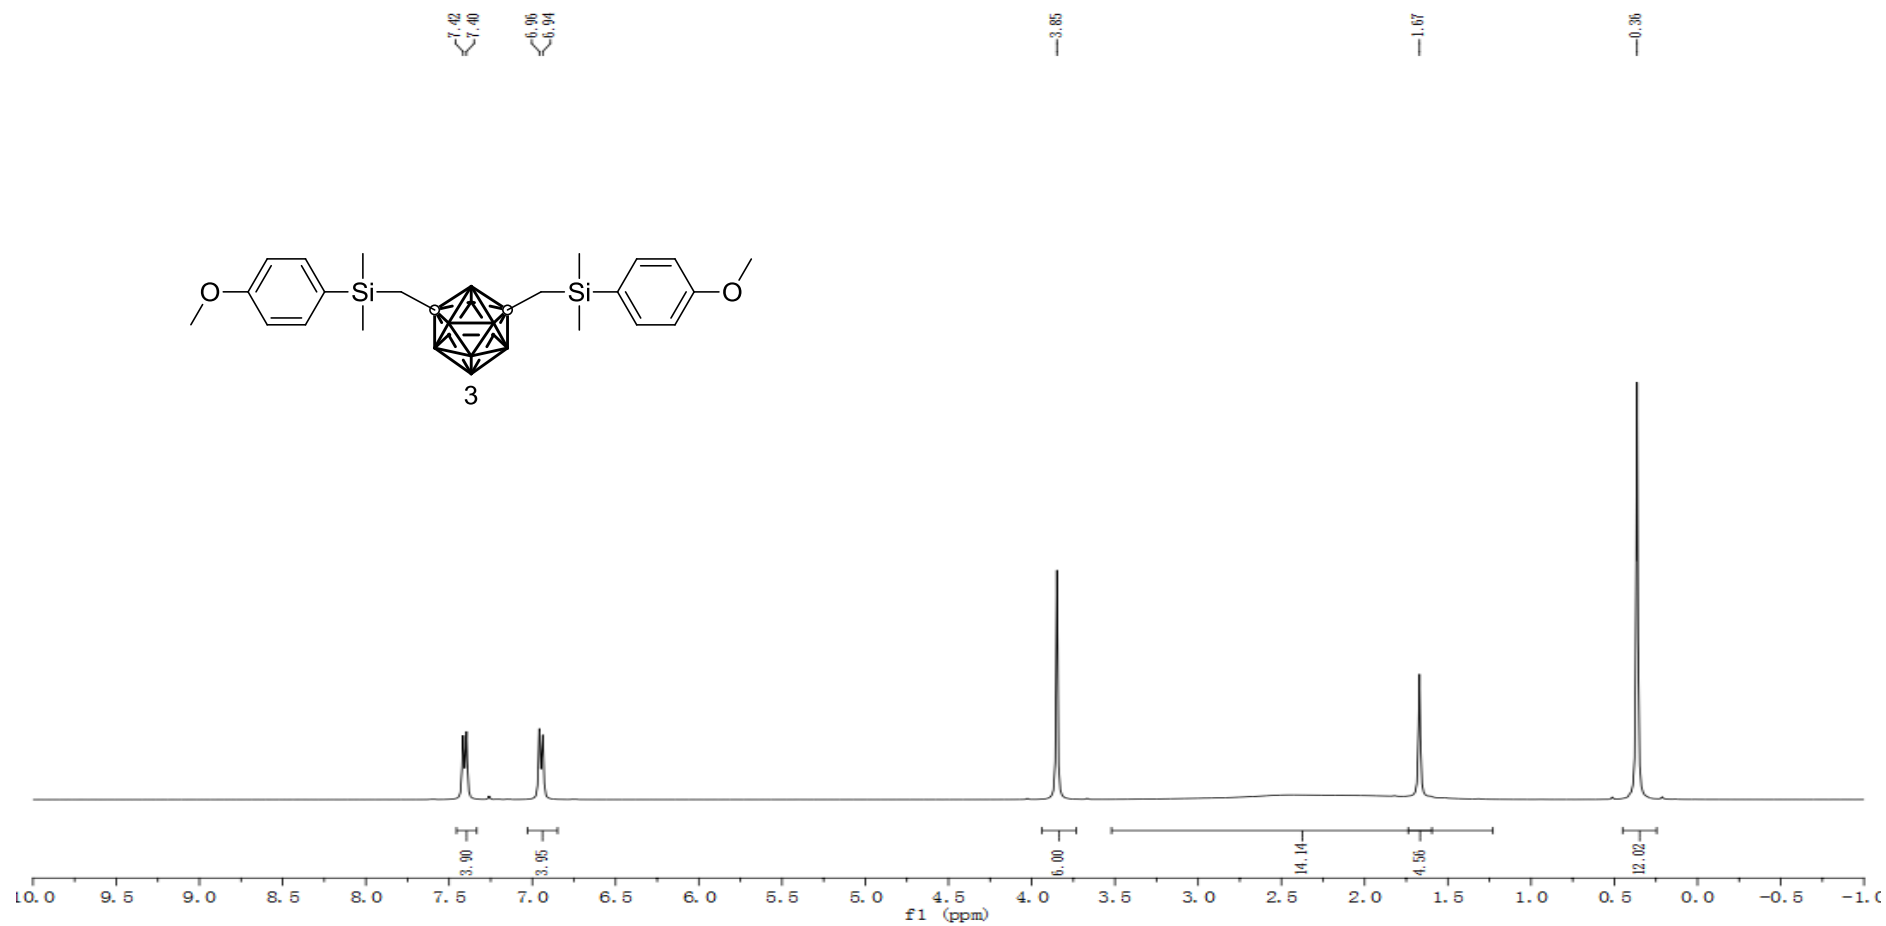



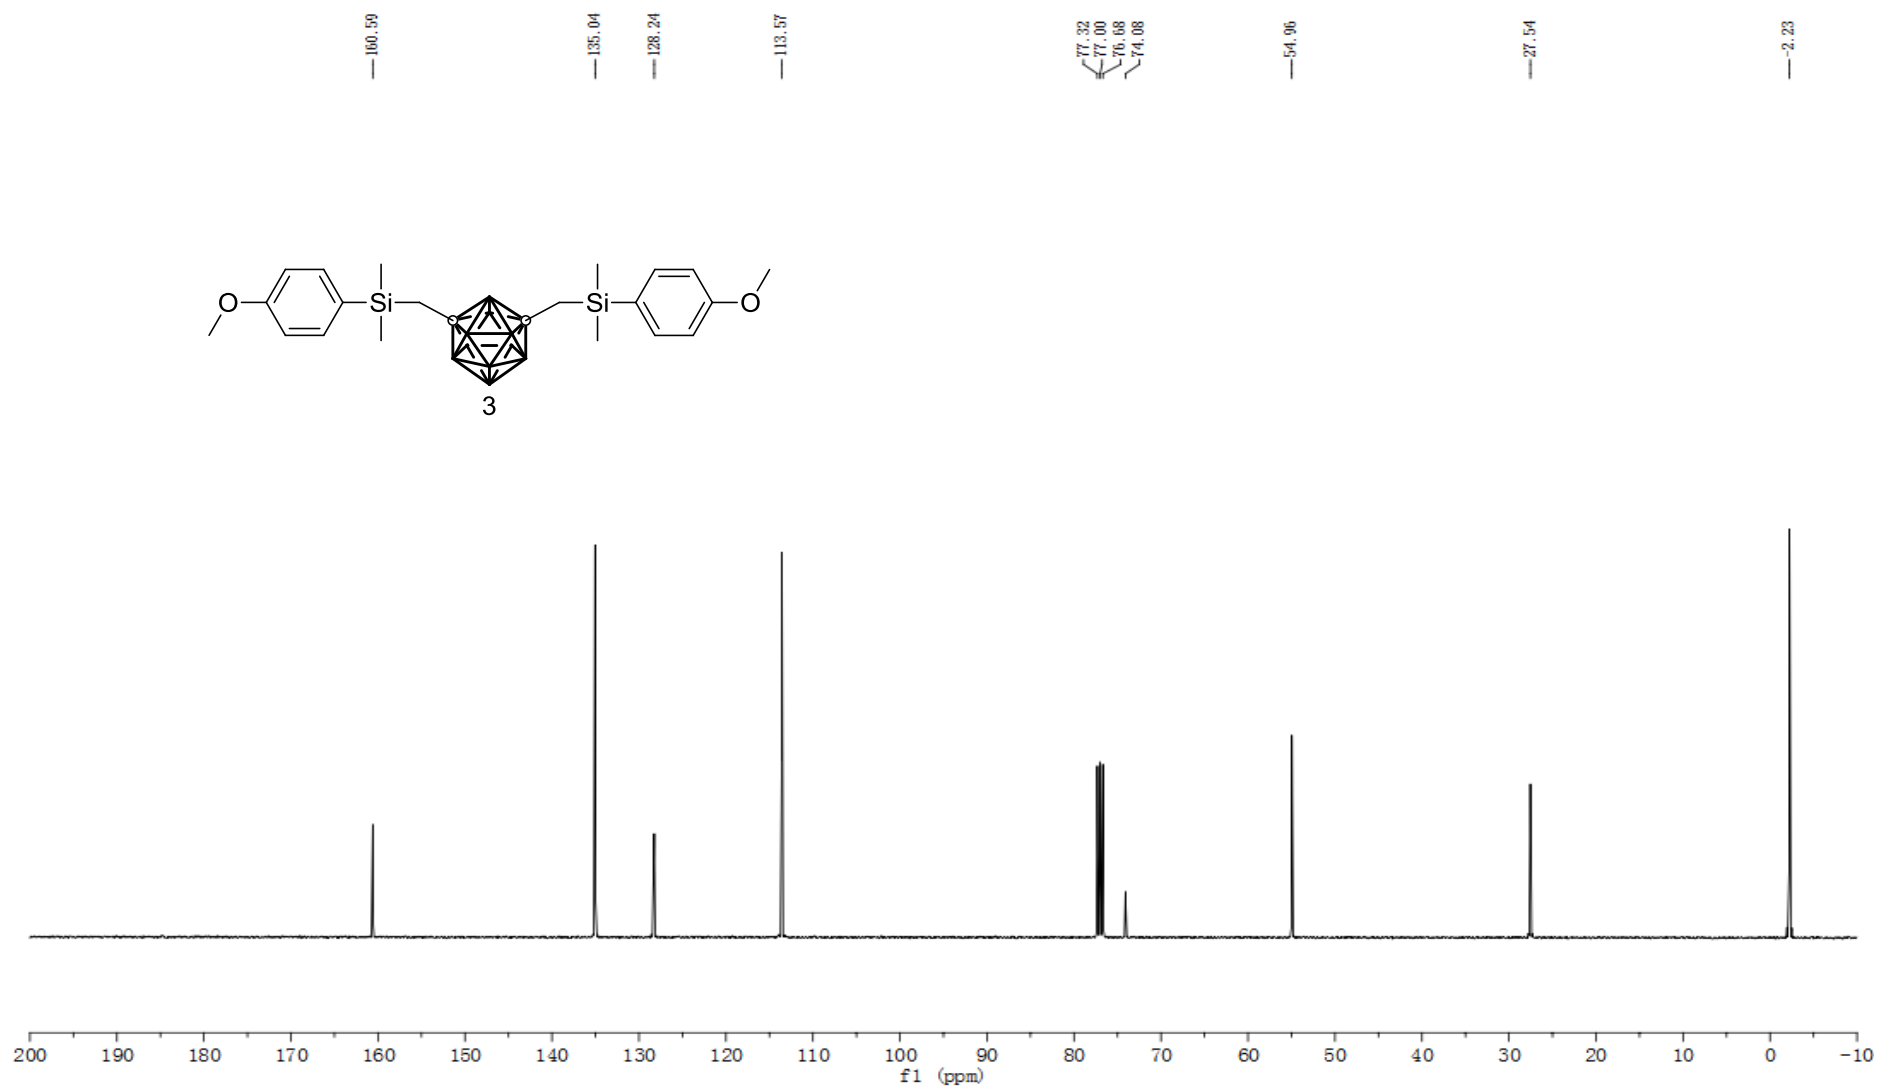

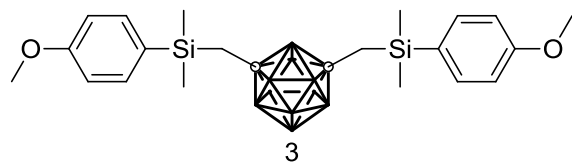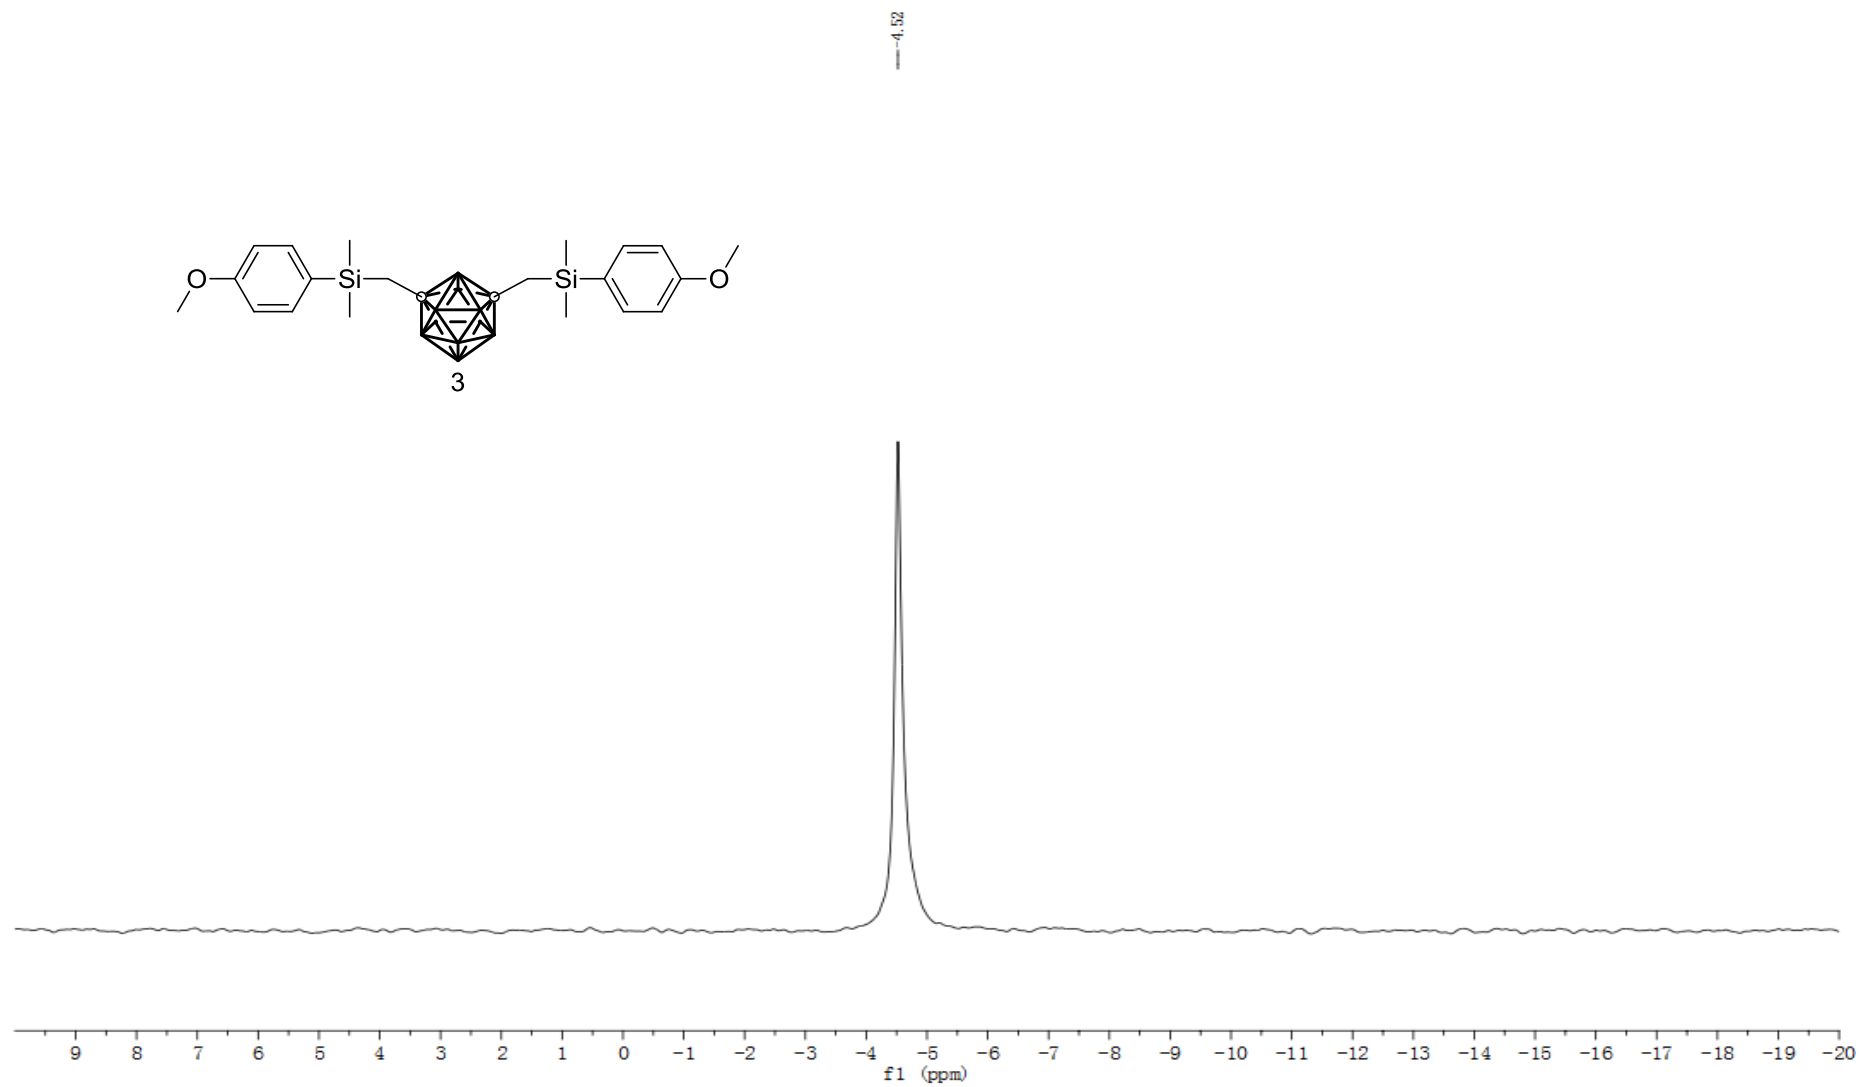

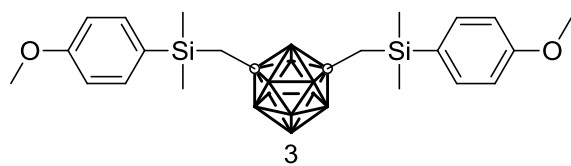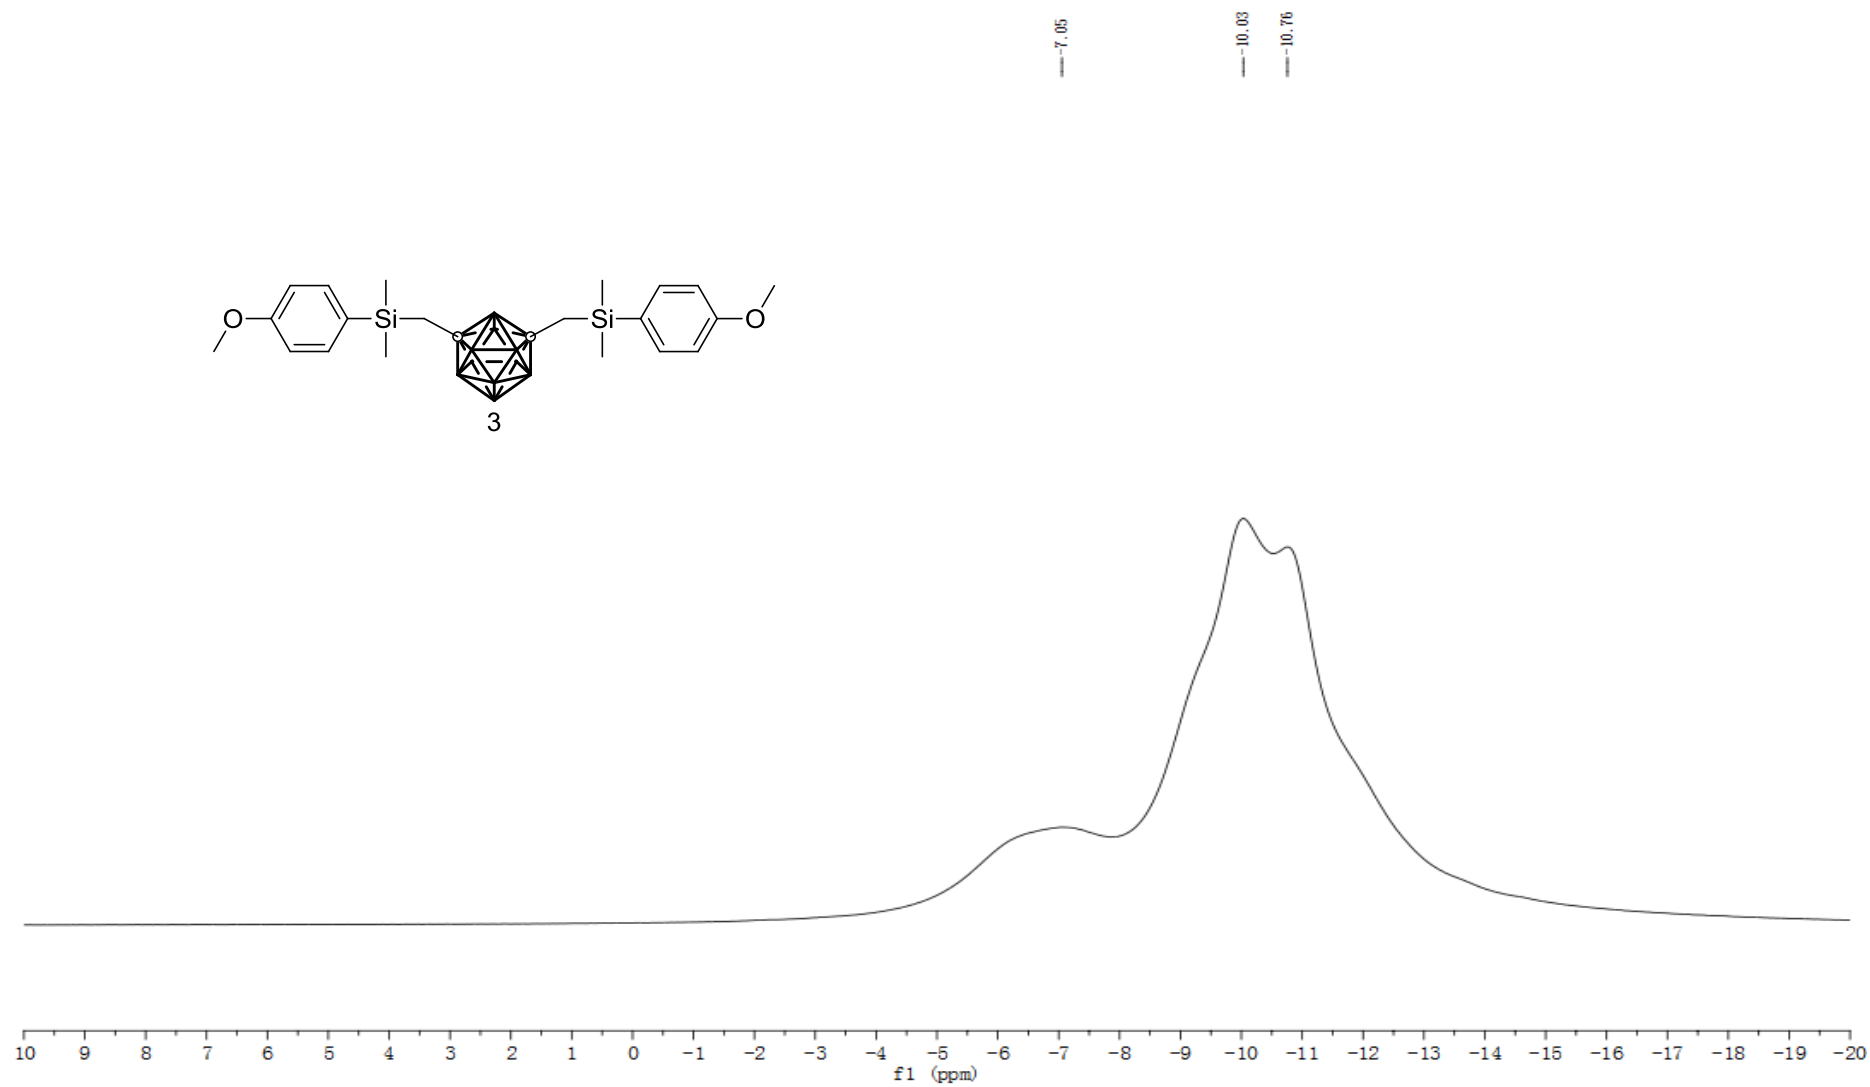

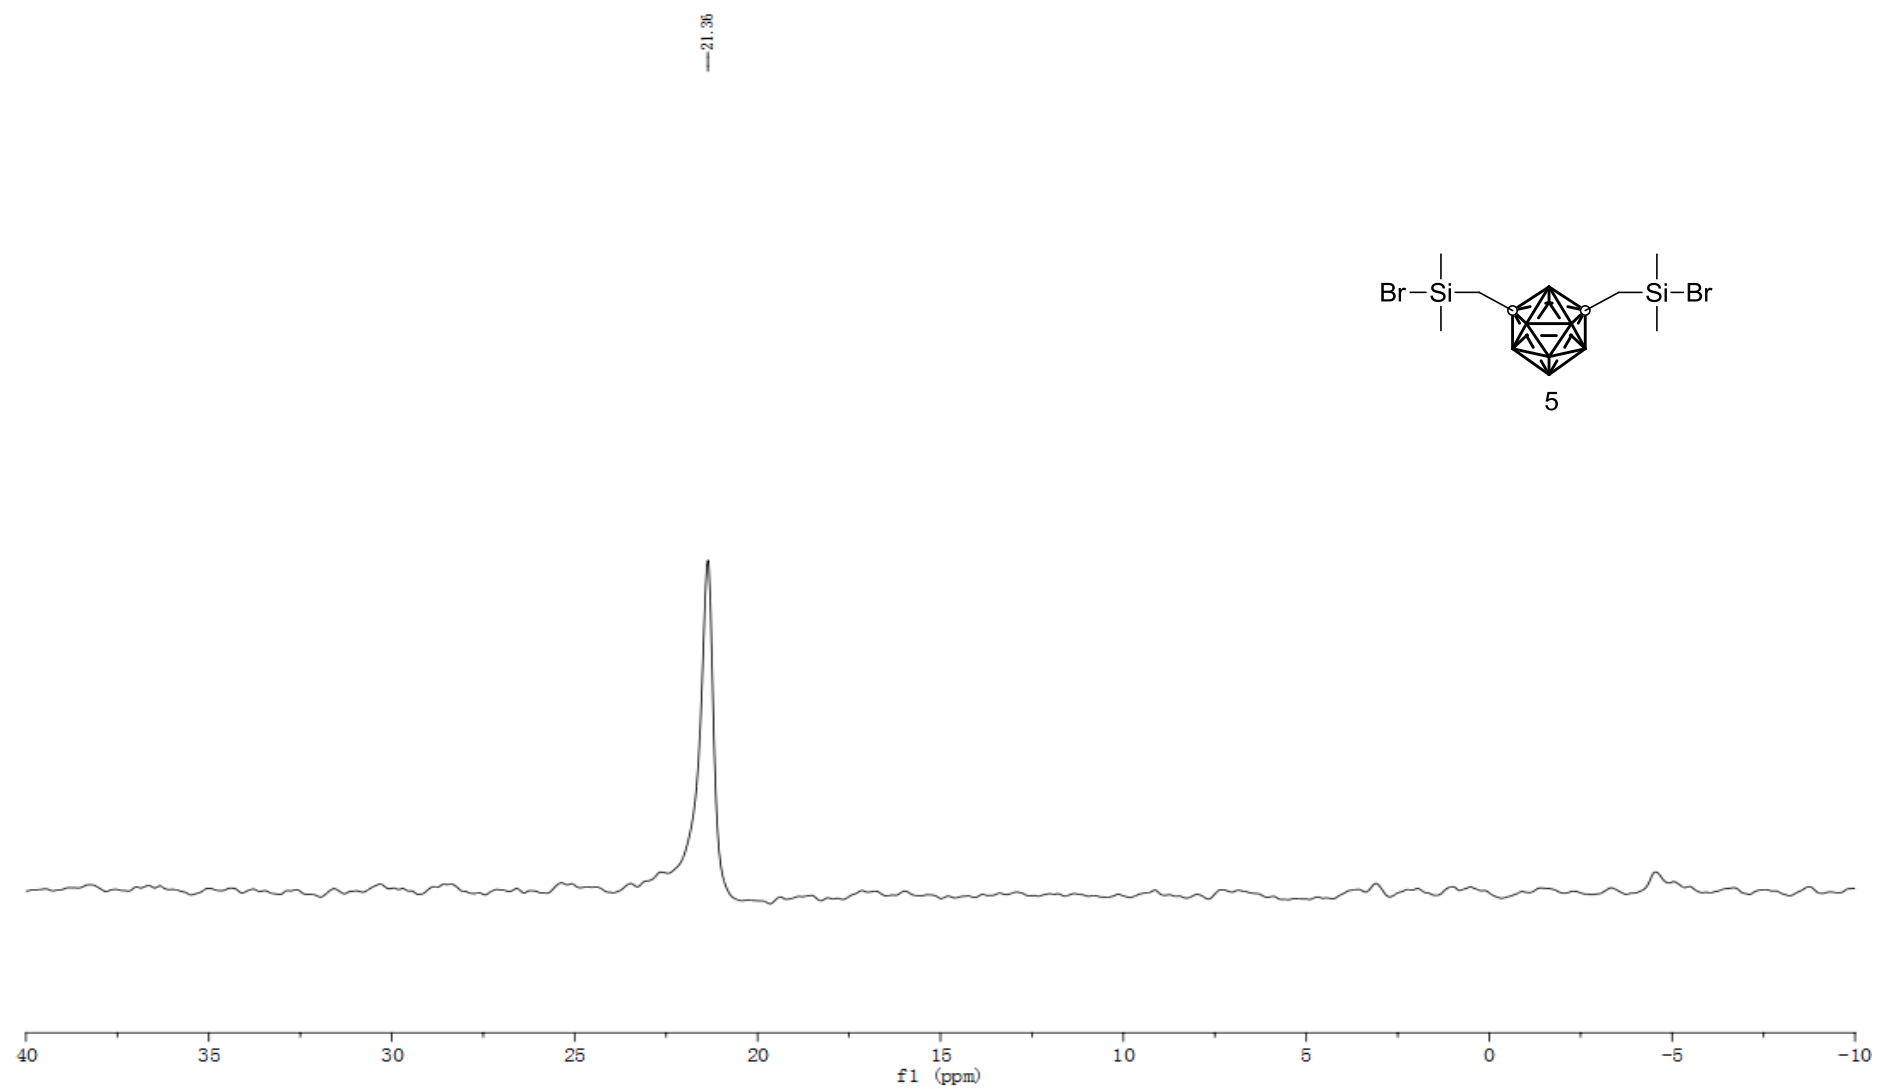

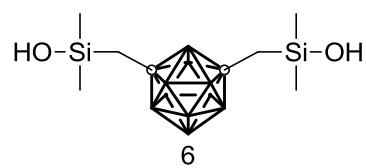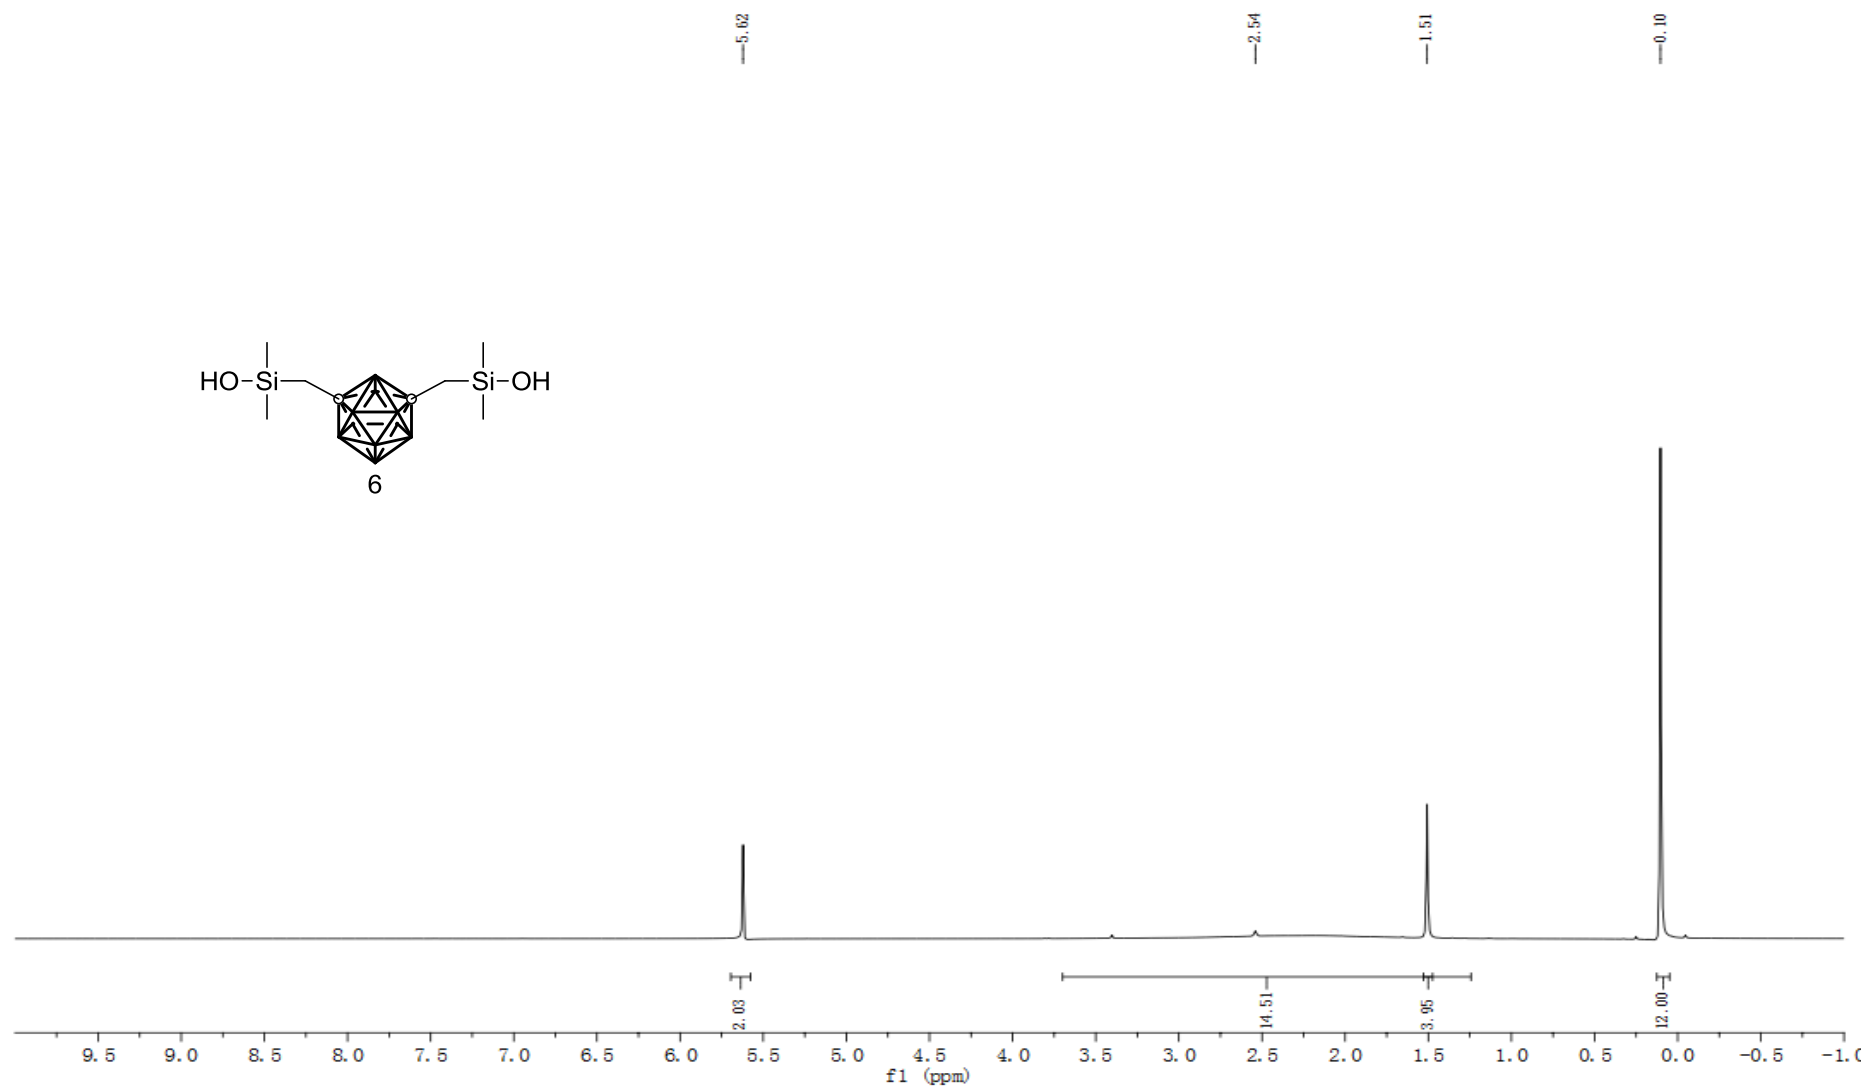

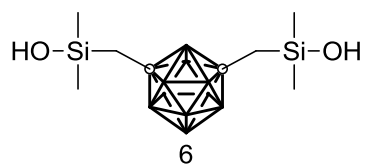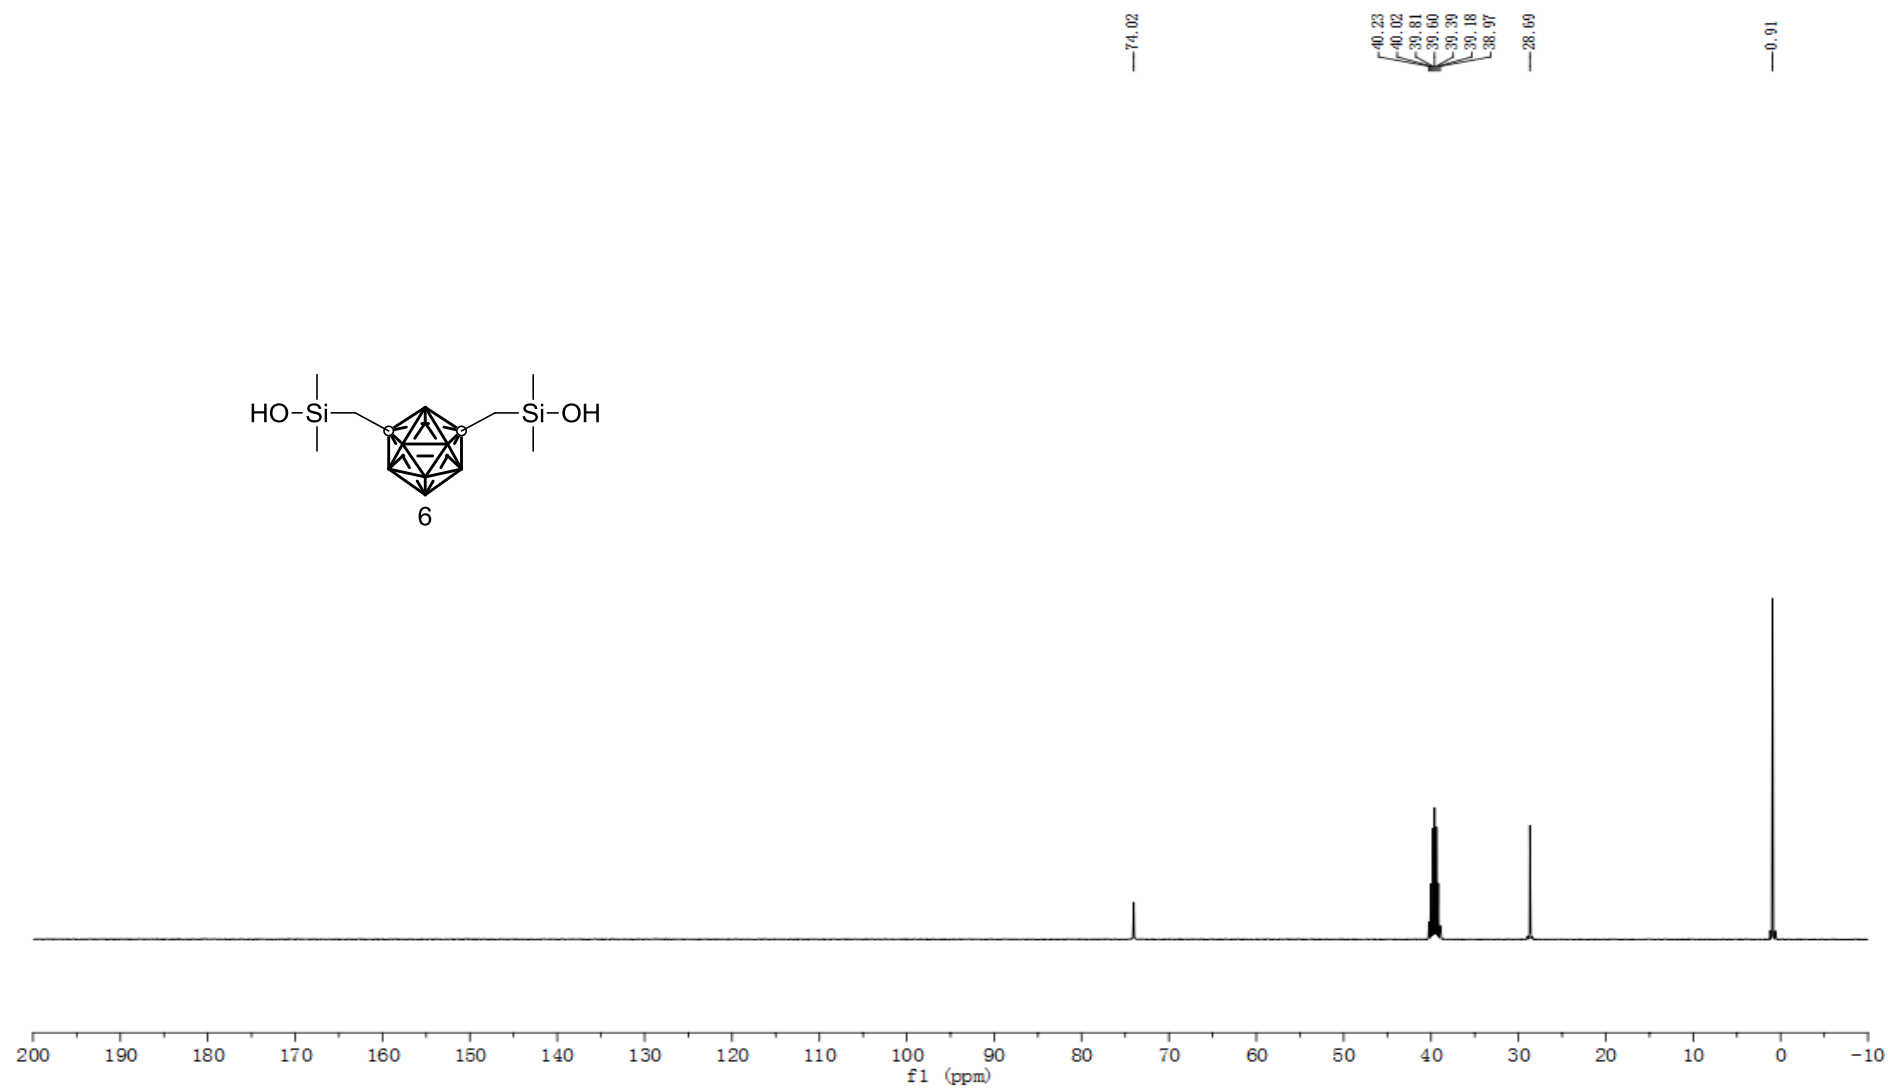

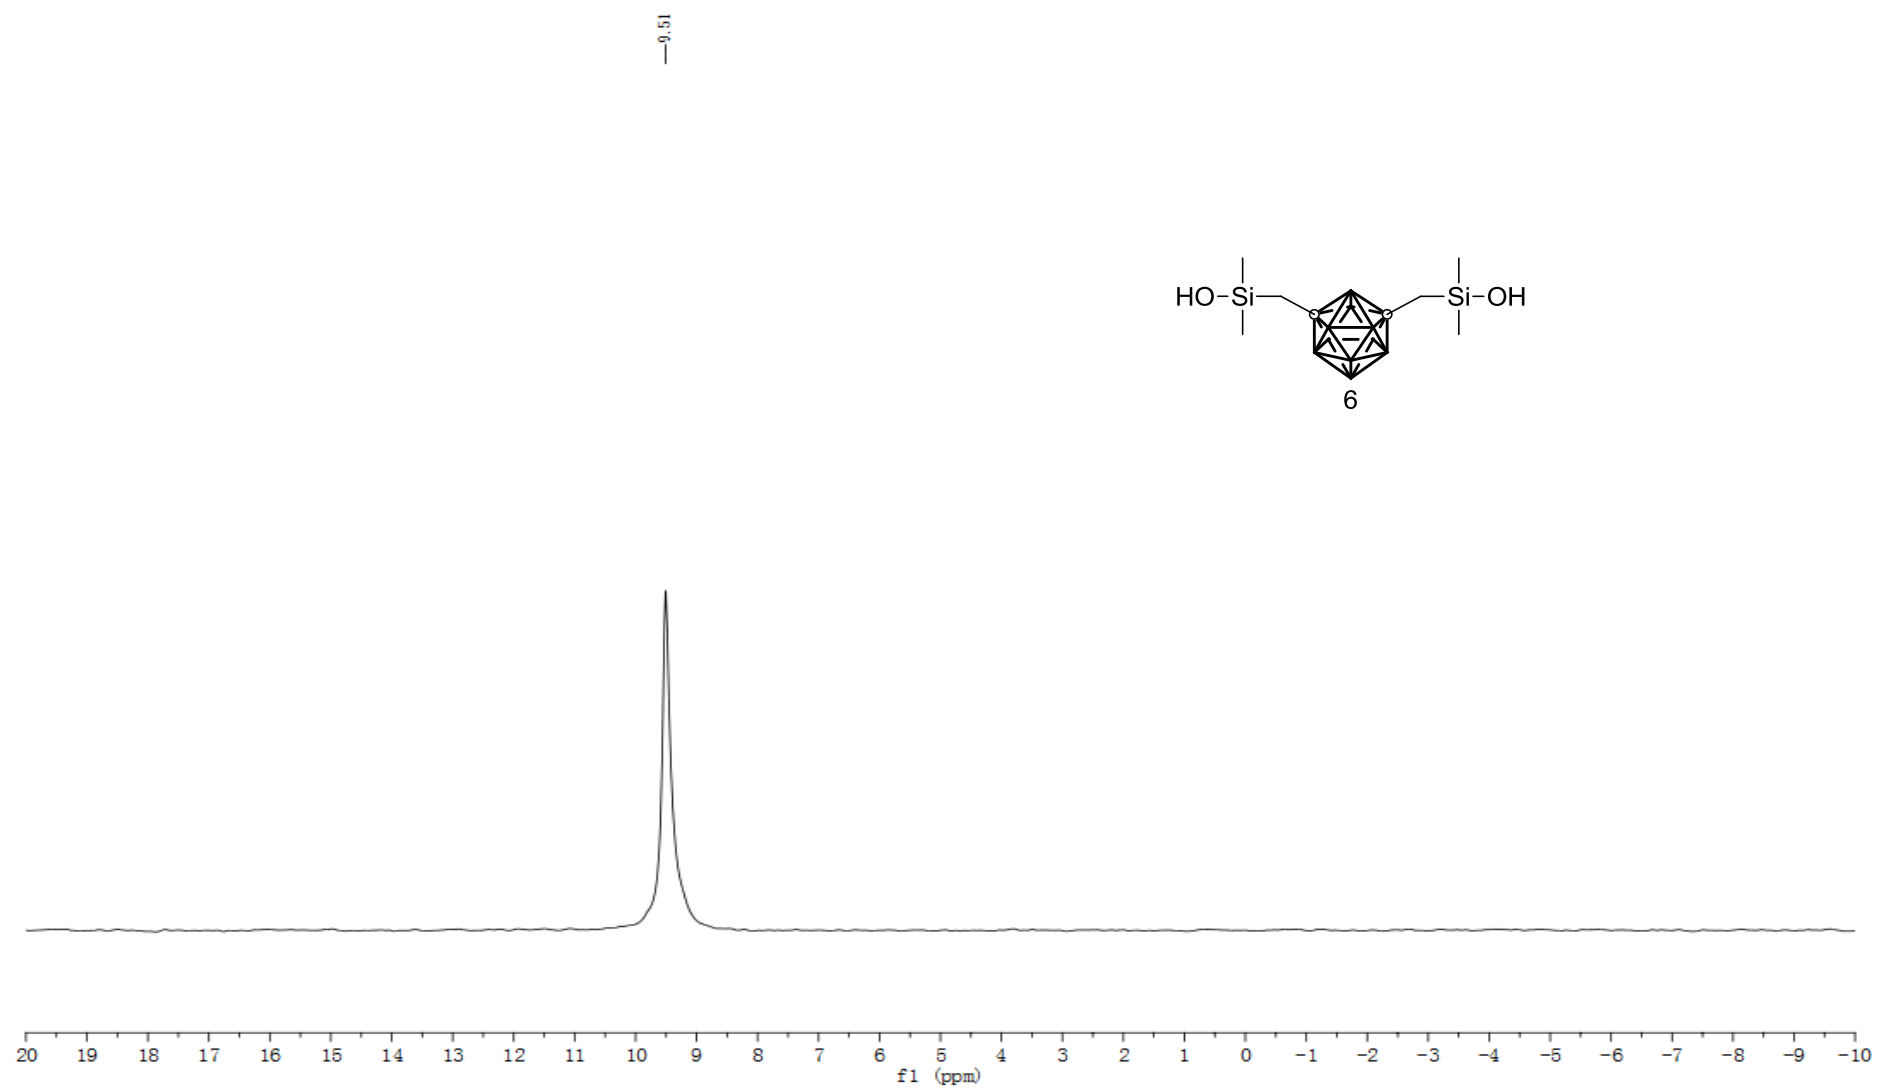

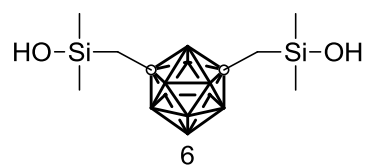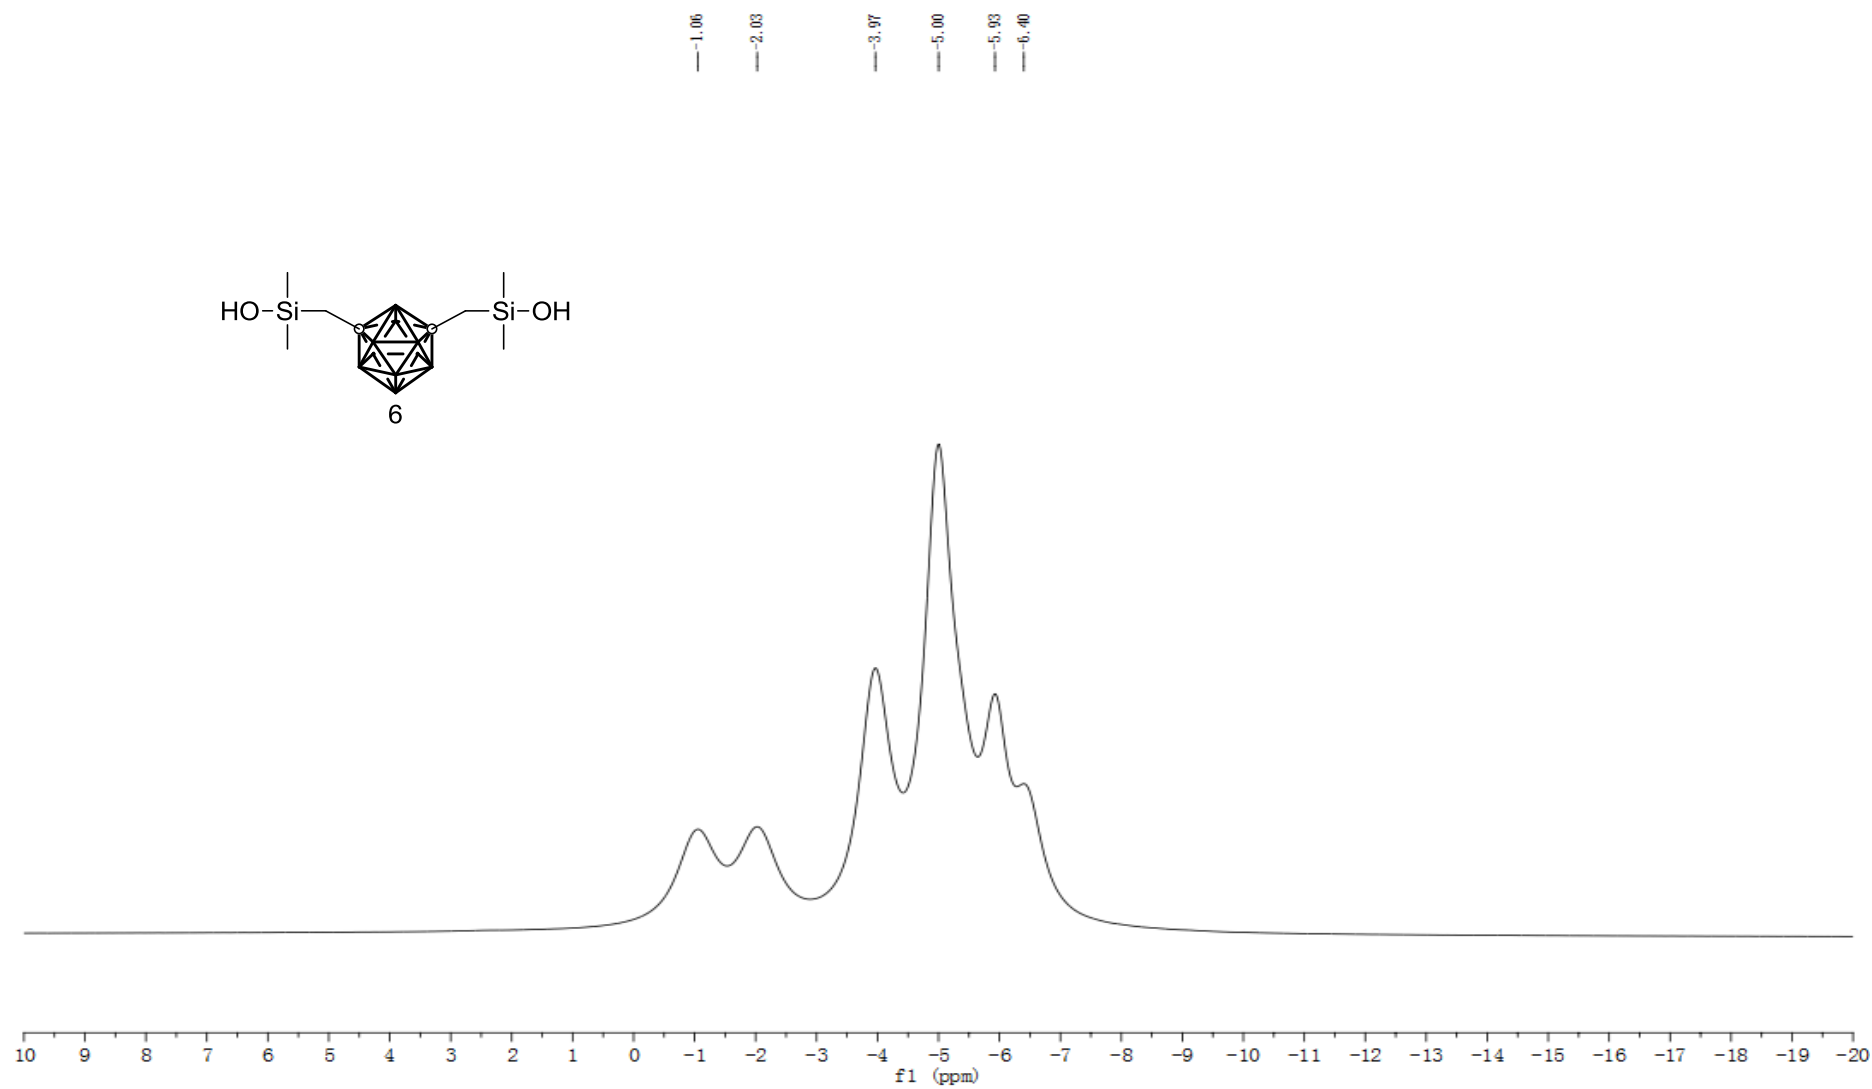



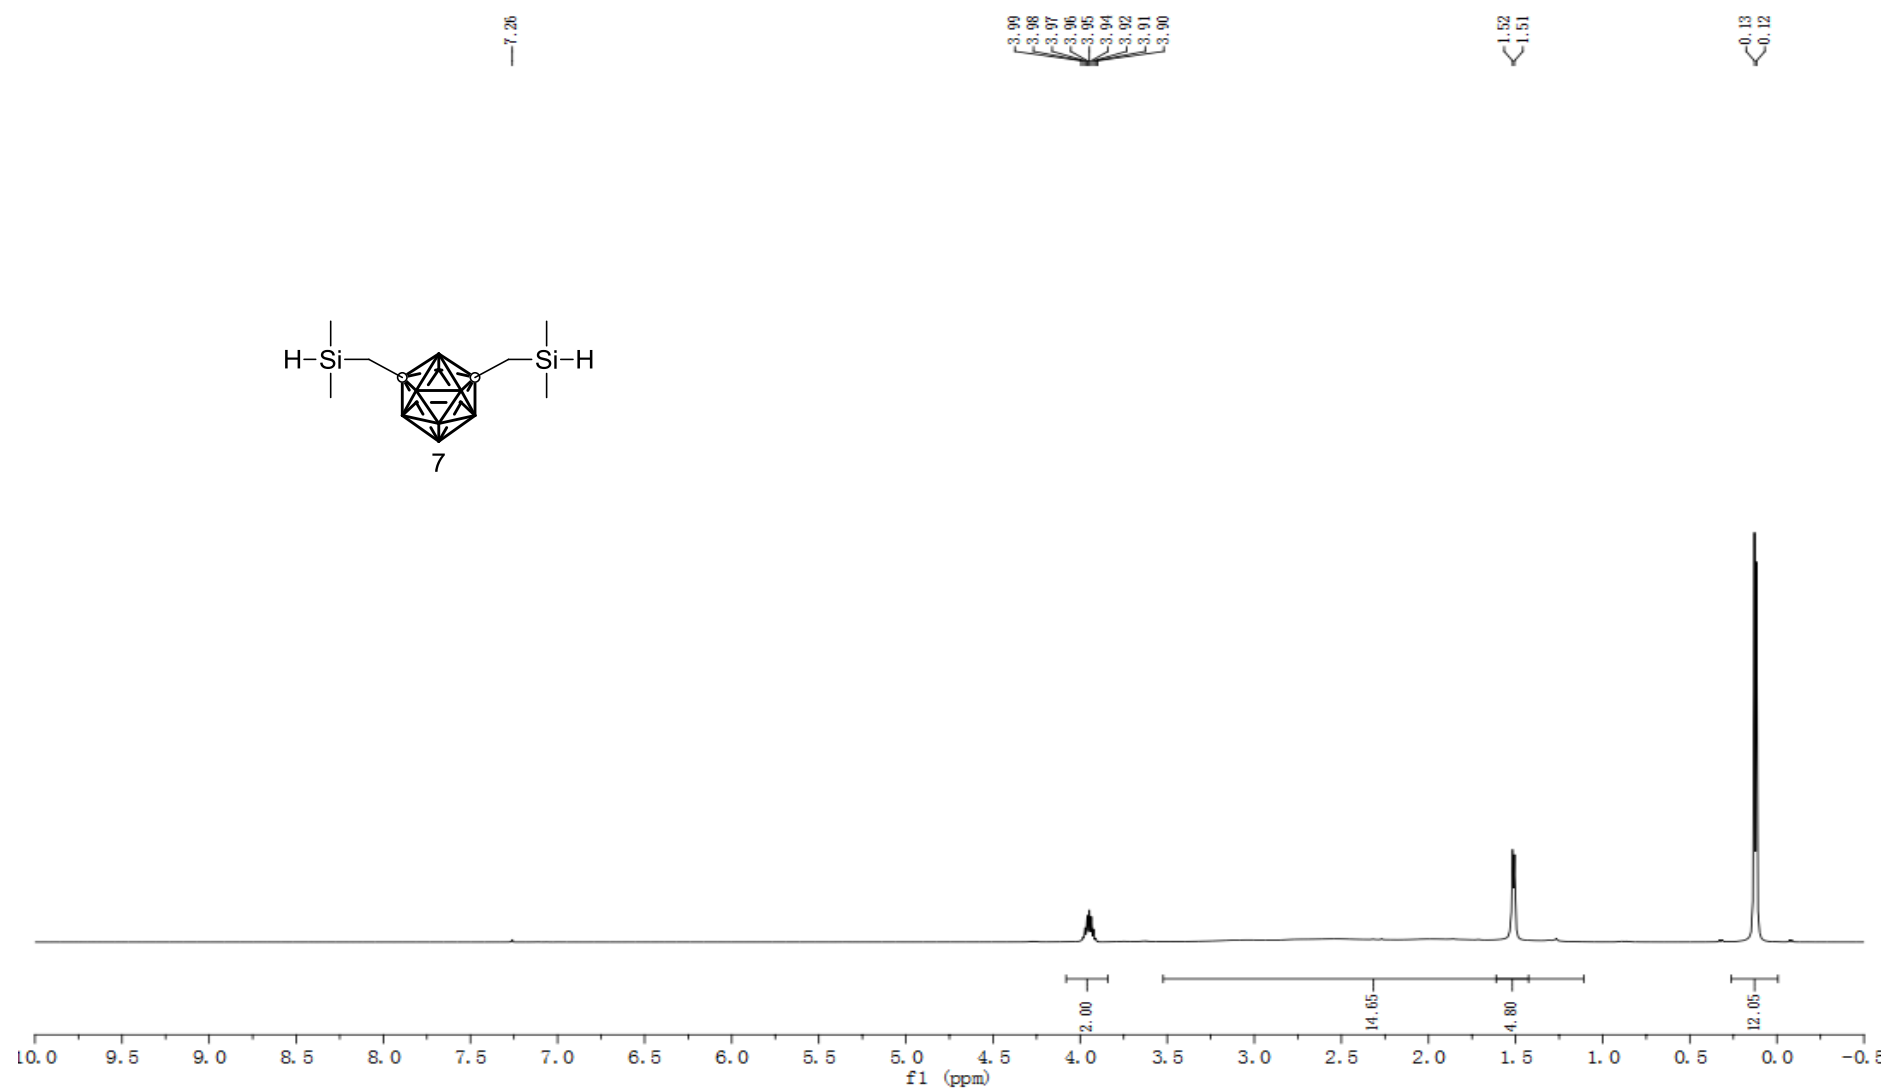

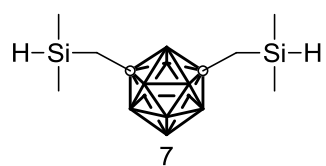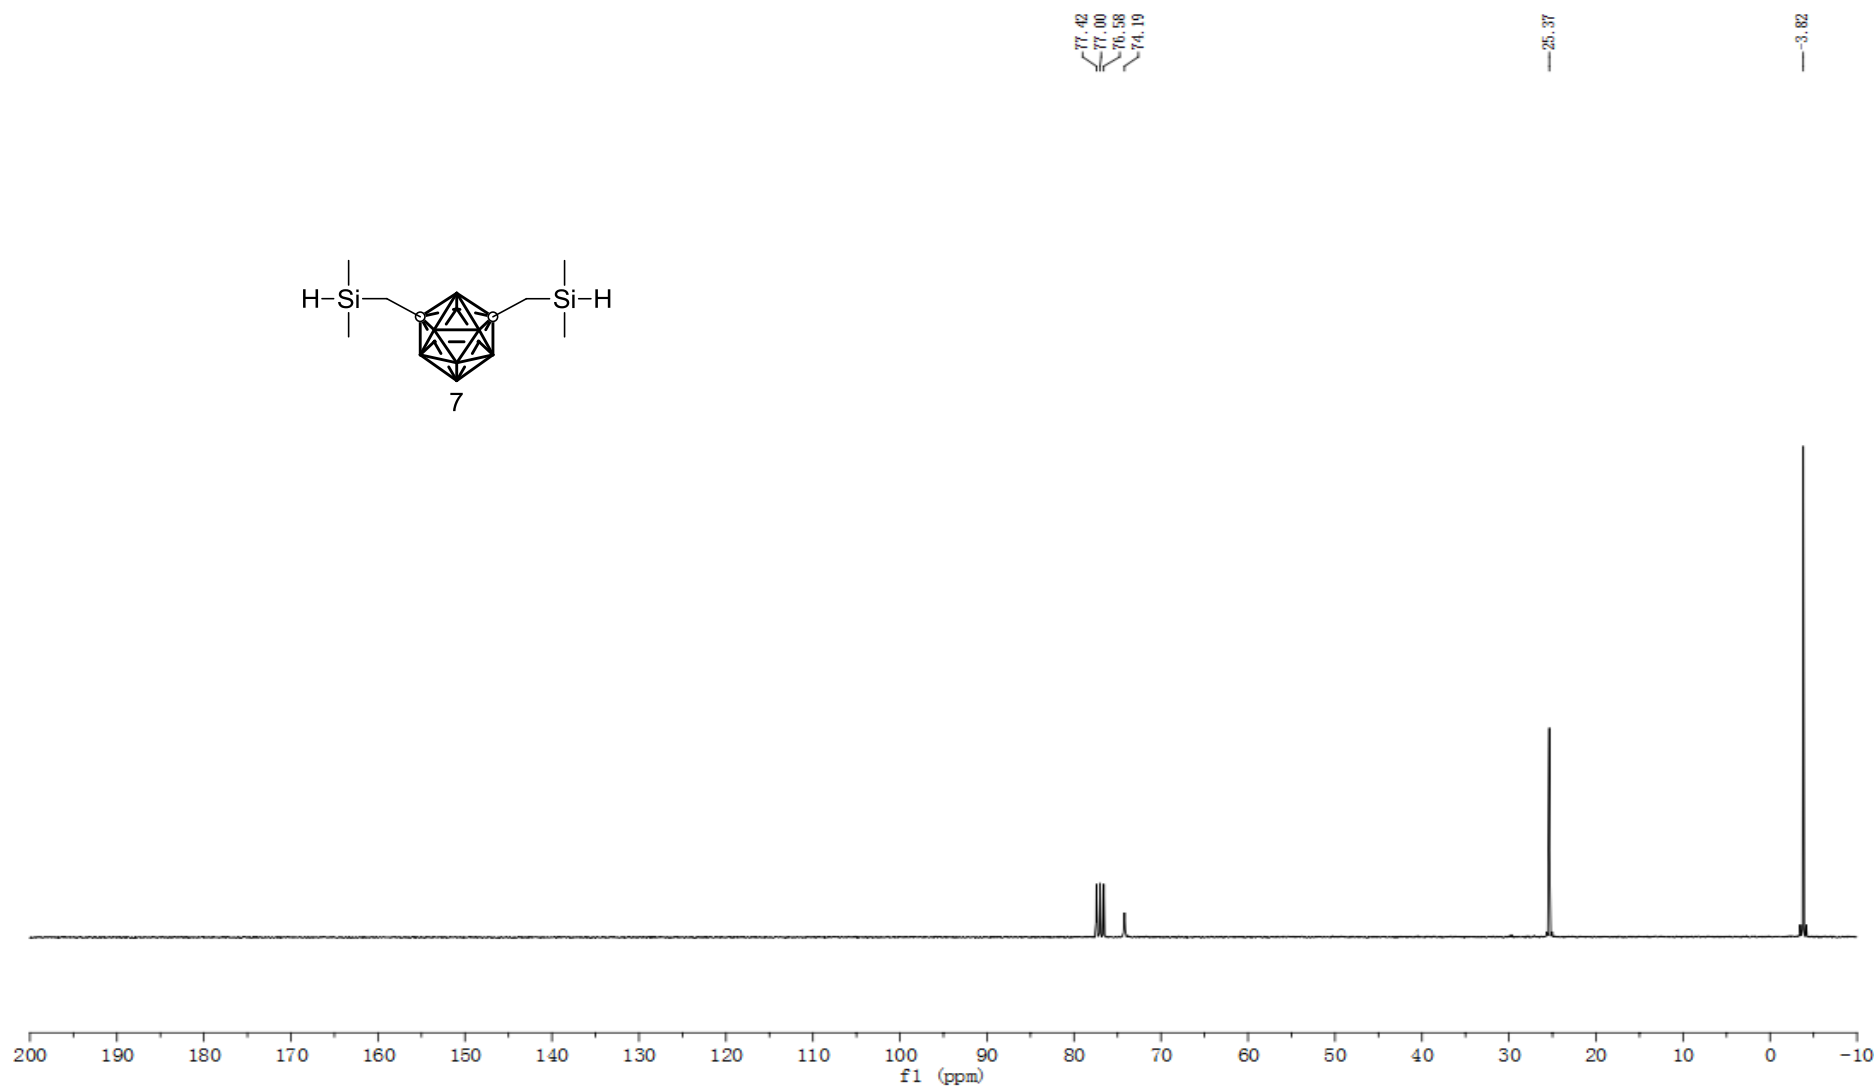

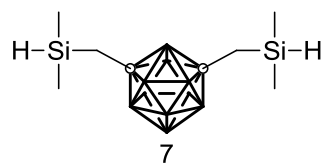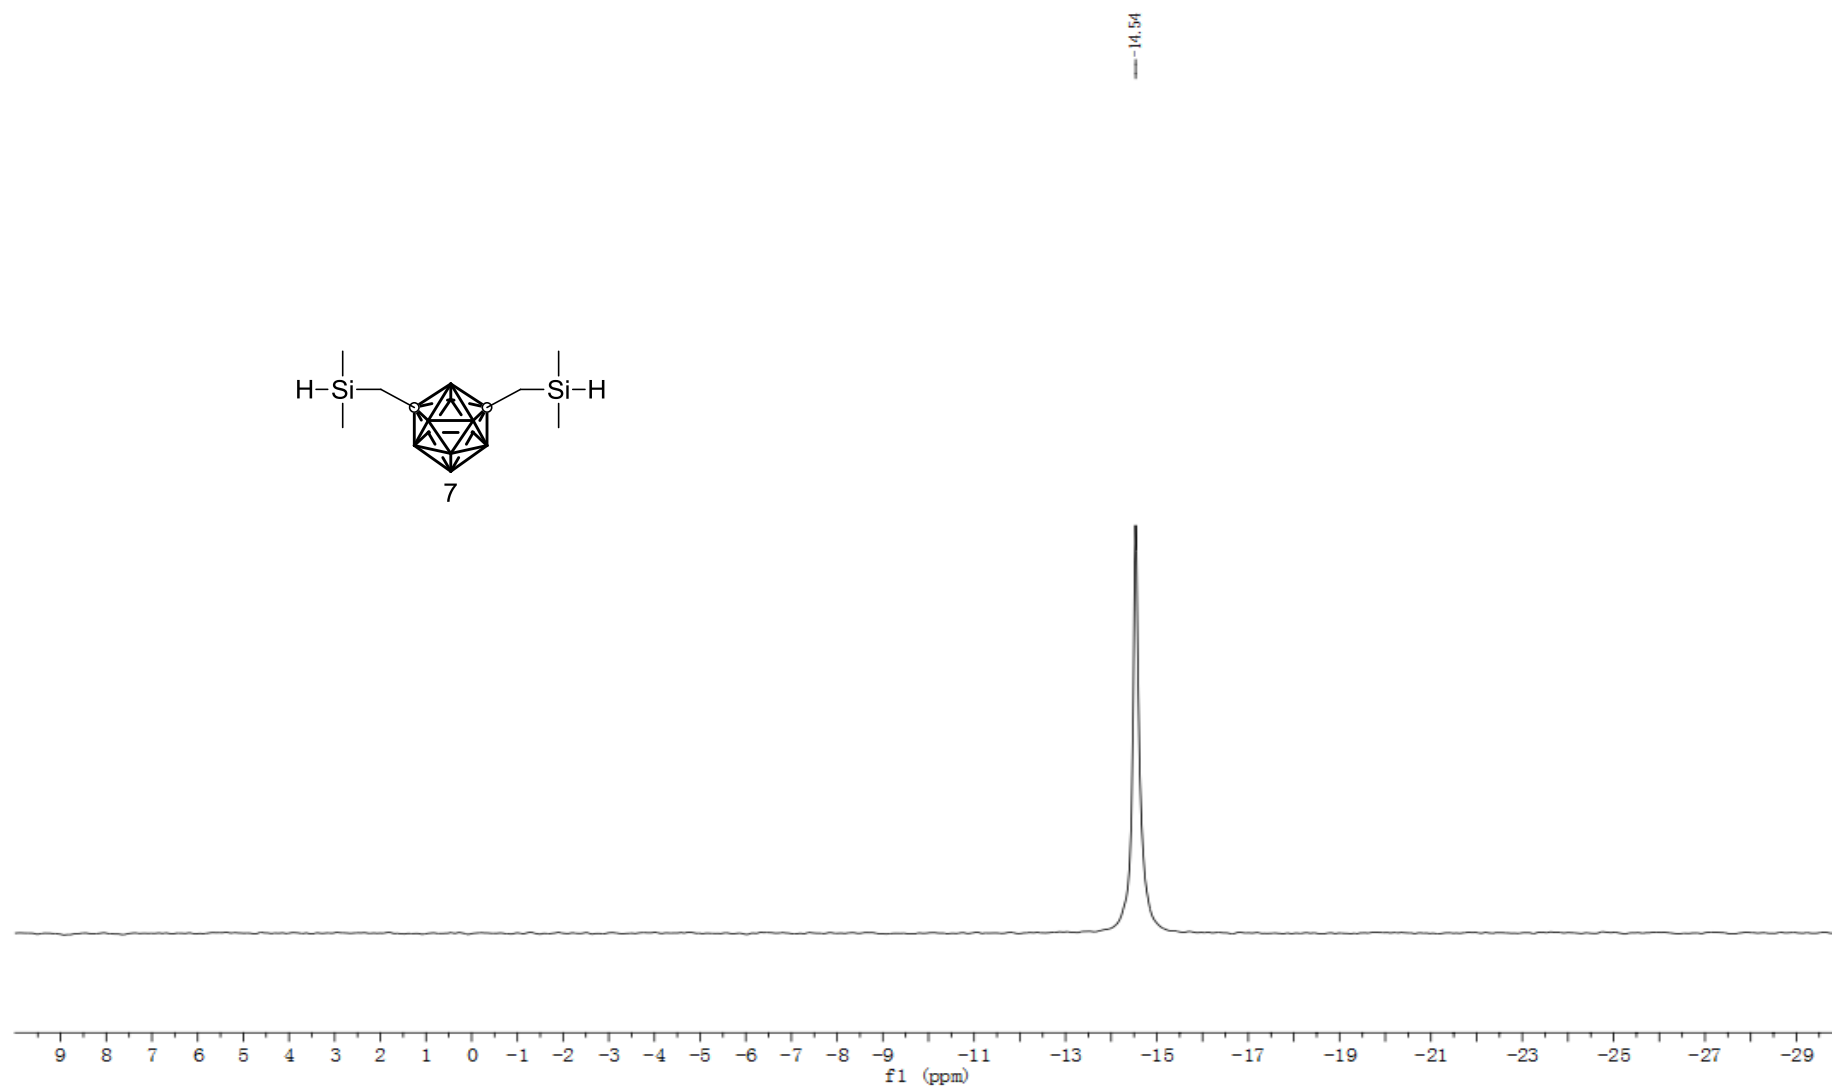

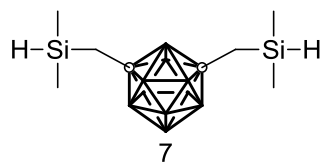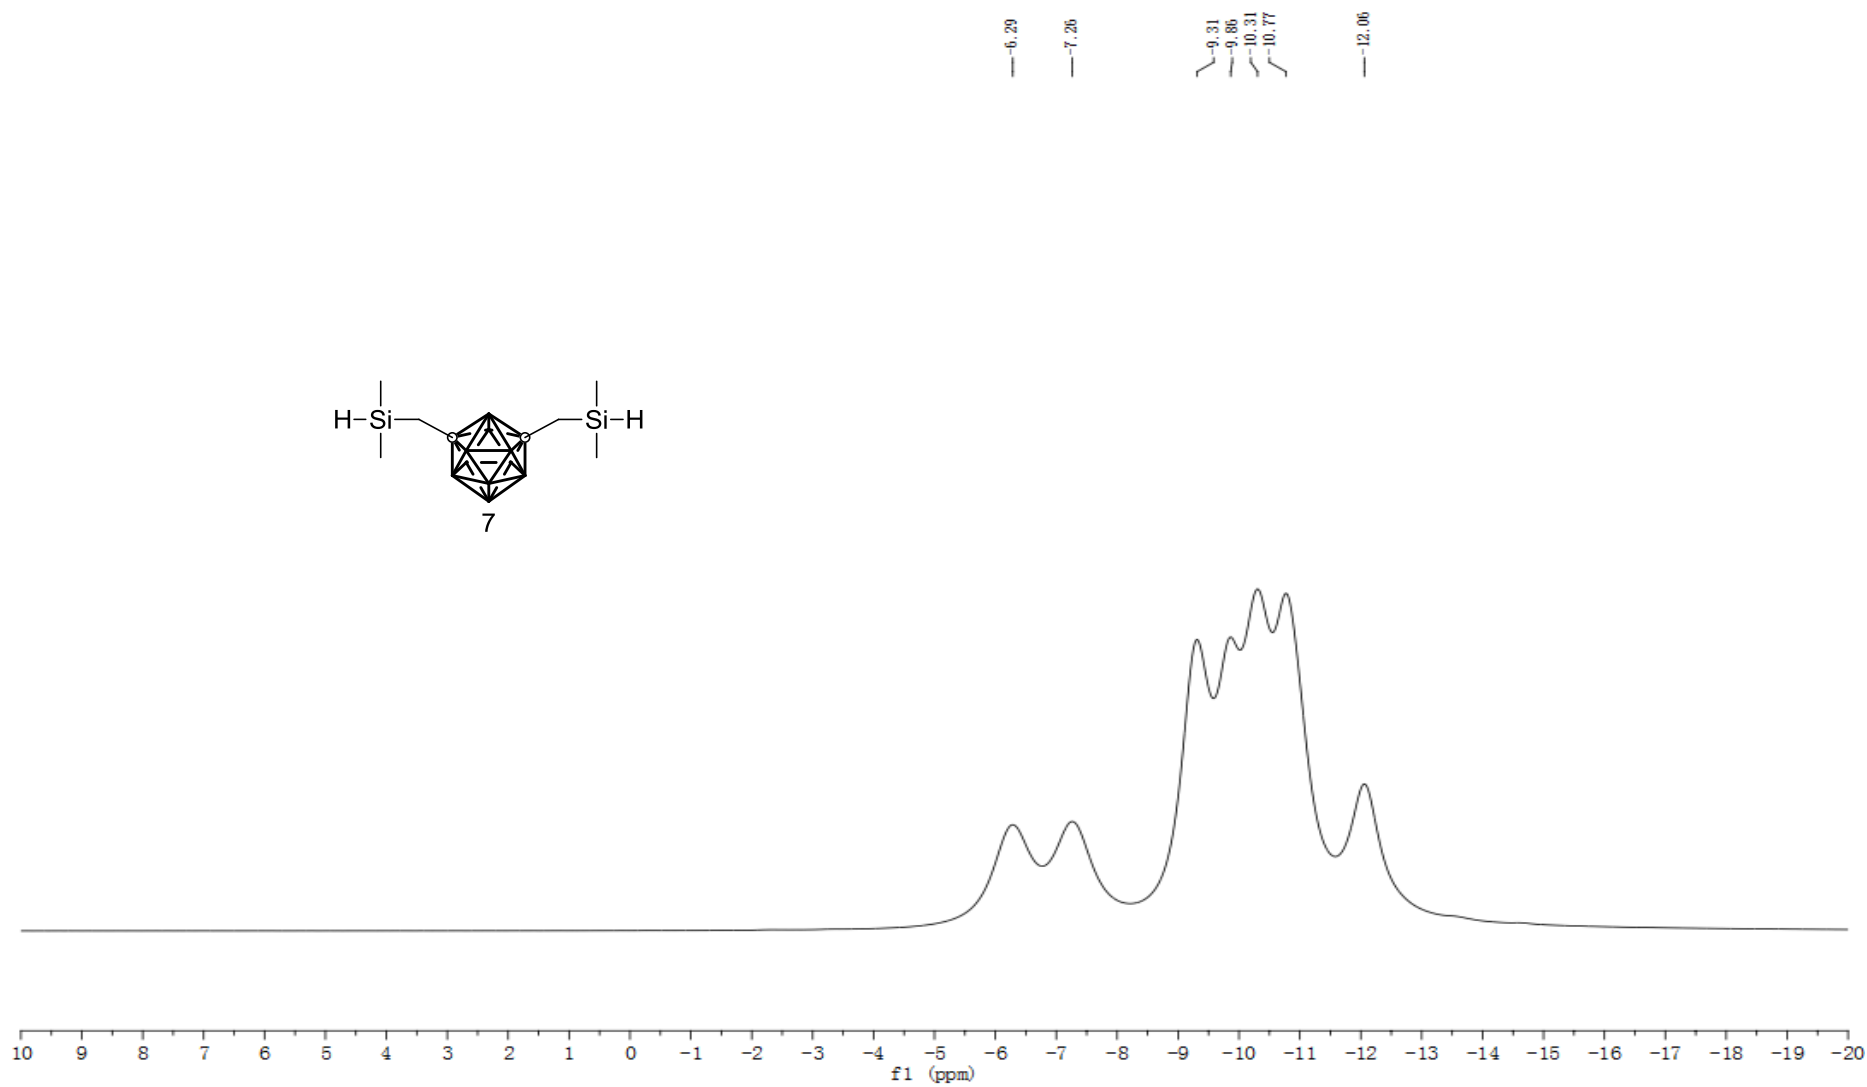

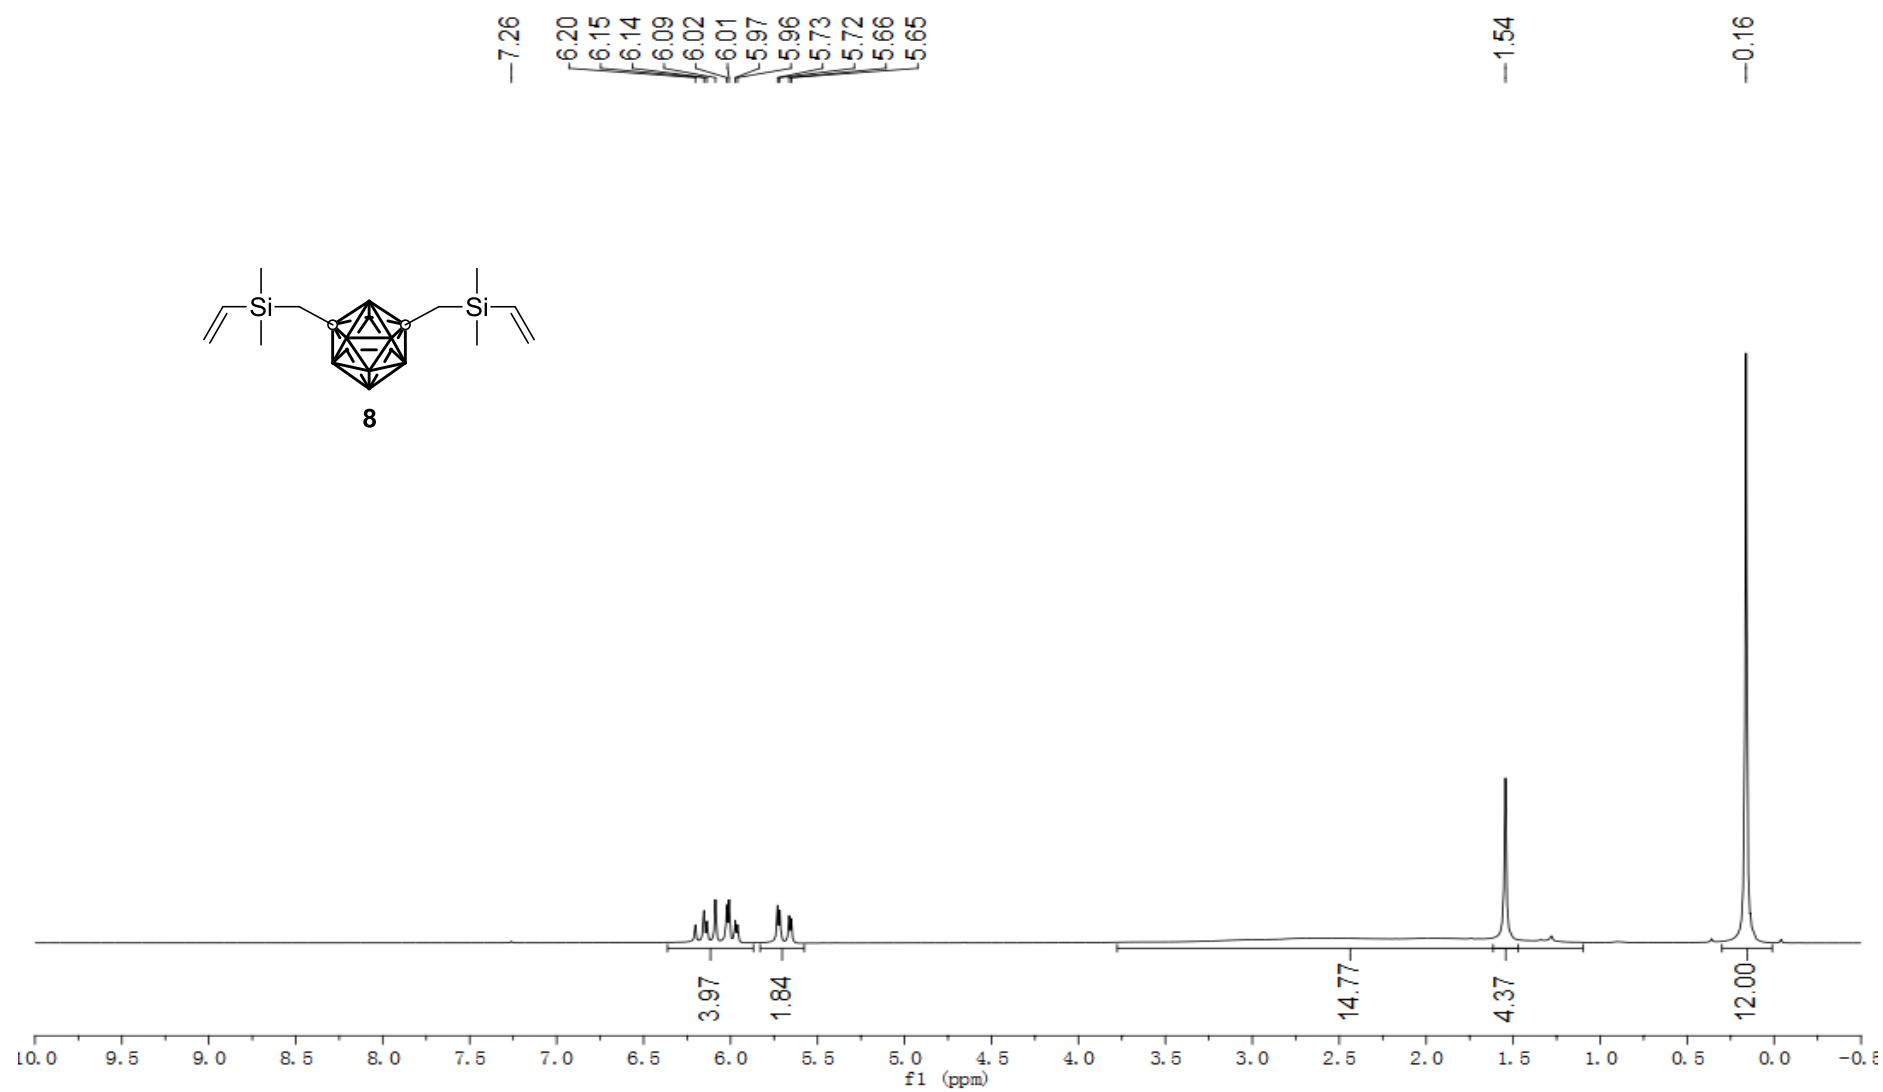

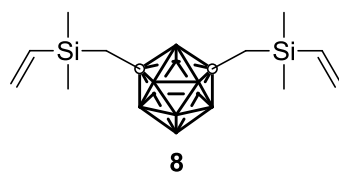

—137.64  
—132.64

77.42  
77.00  
76.58  
74.12

—27.14

—2.60

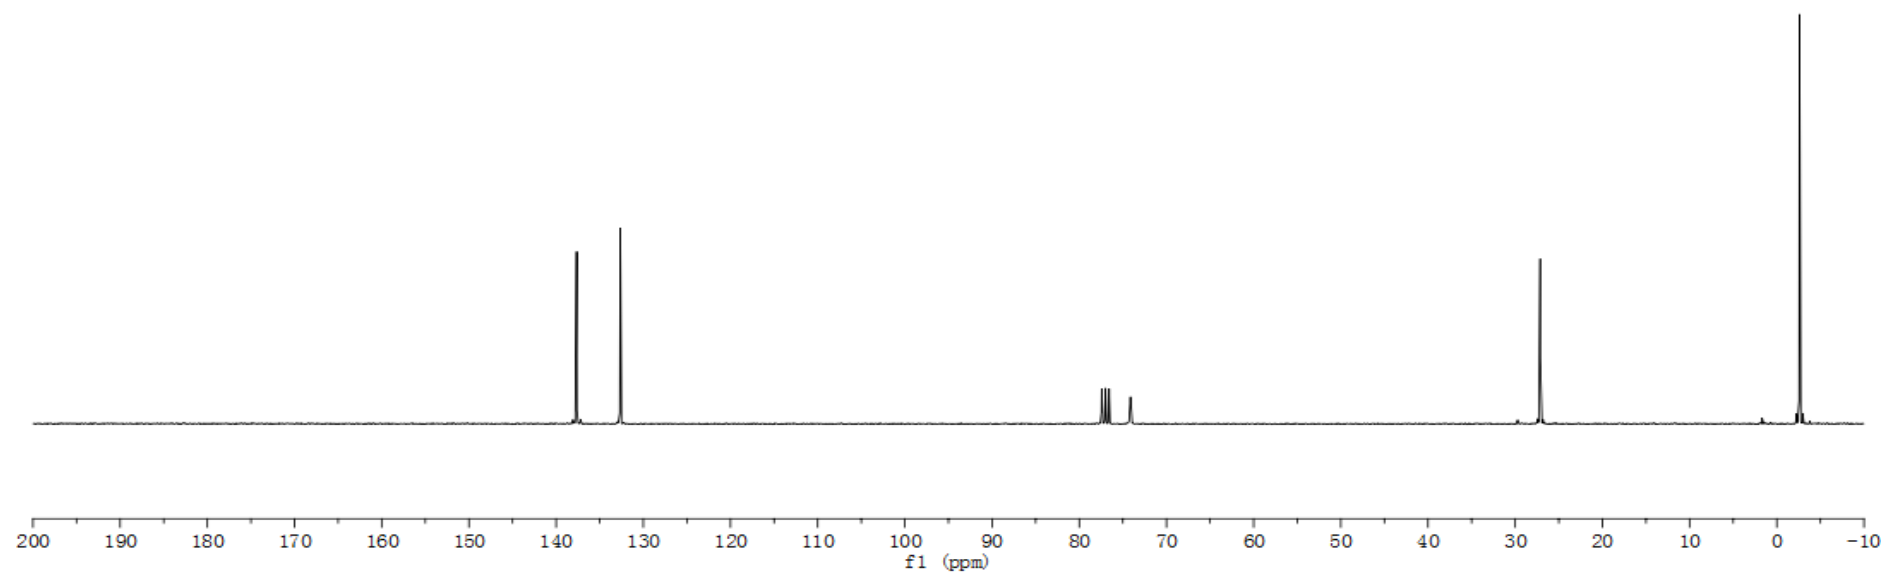

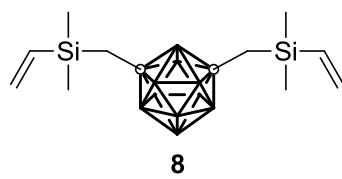

--6.20

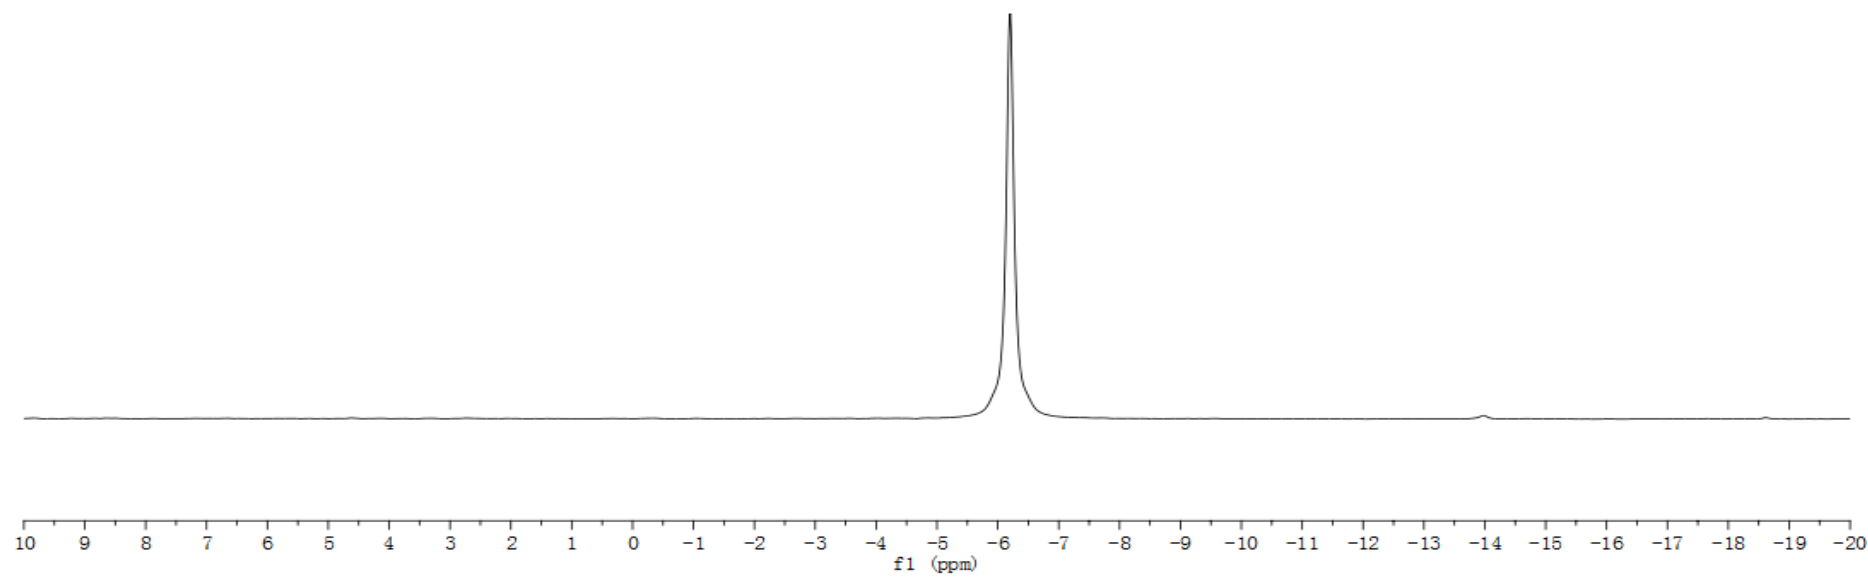

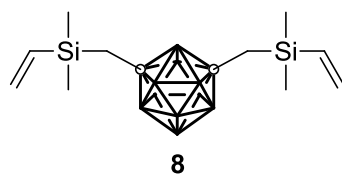

Chemical shifts (ppm) for the peaks in the spectrum:

- 6.01
- 6.99
- 9.12
- 9.66
- 10.14
- 10.57
- 11.72

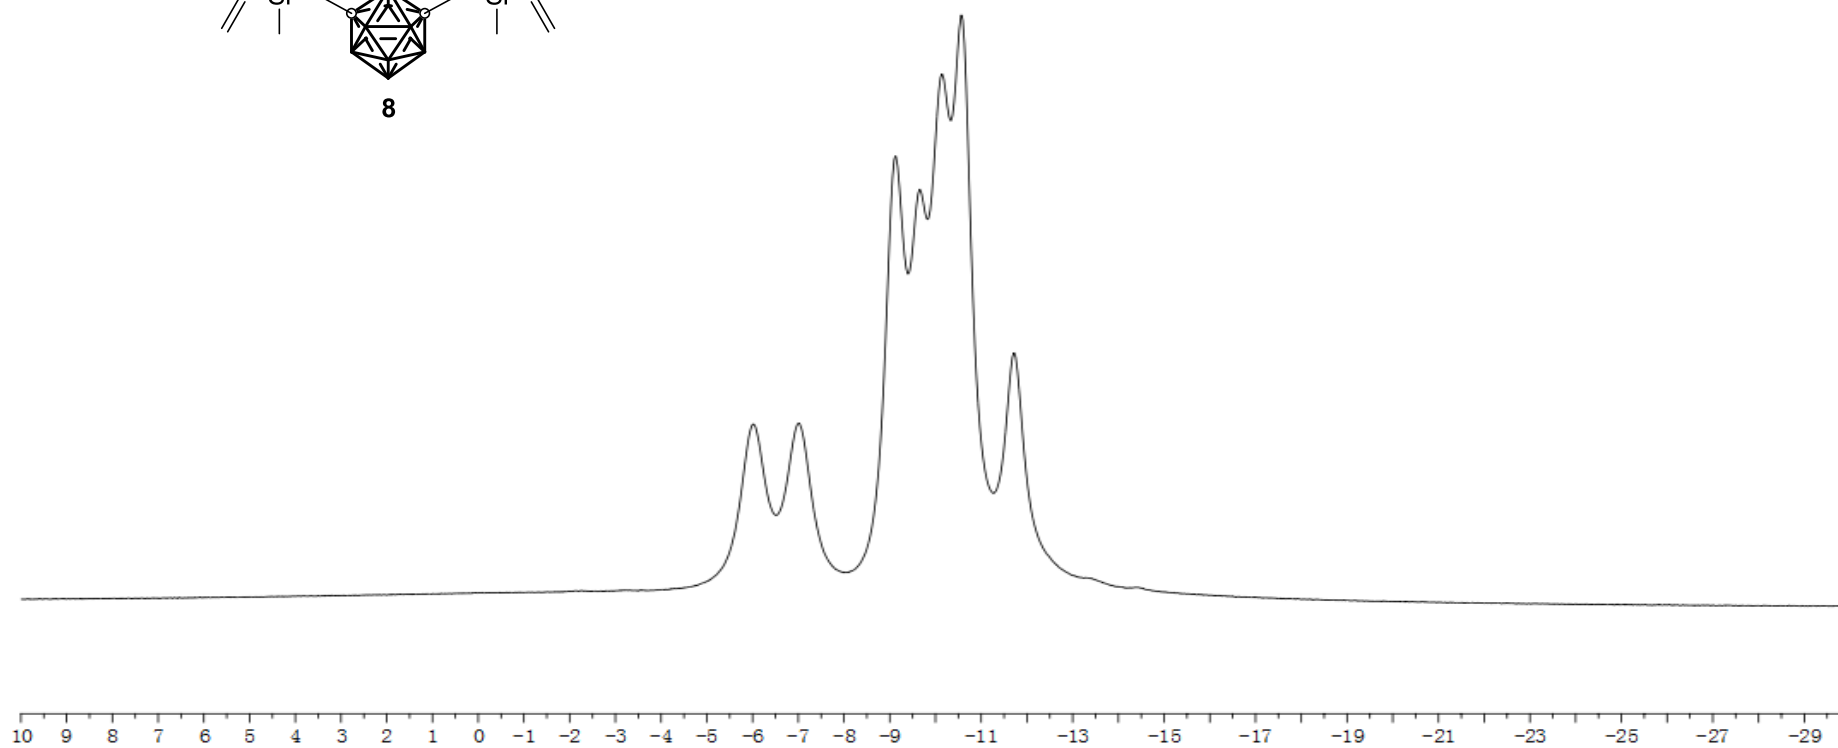



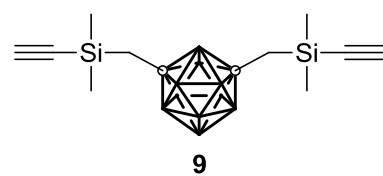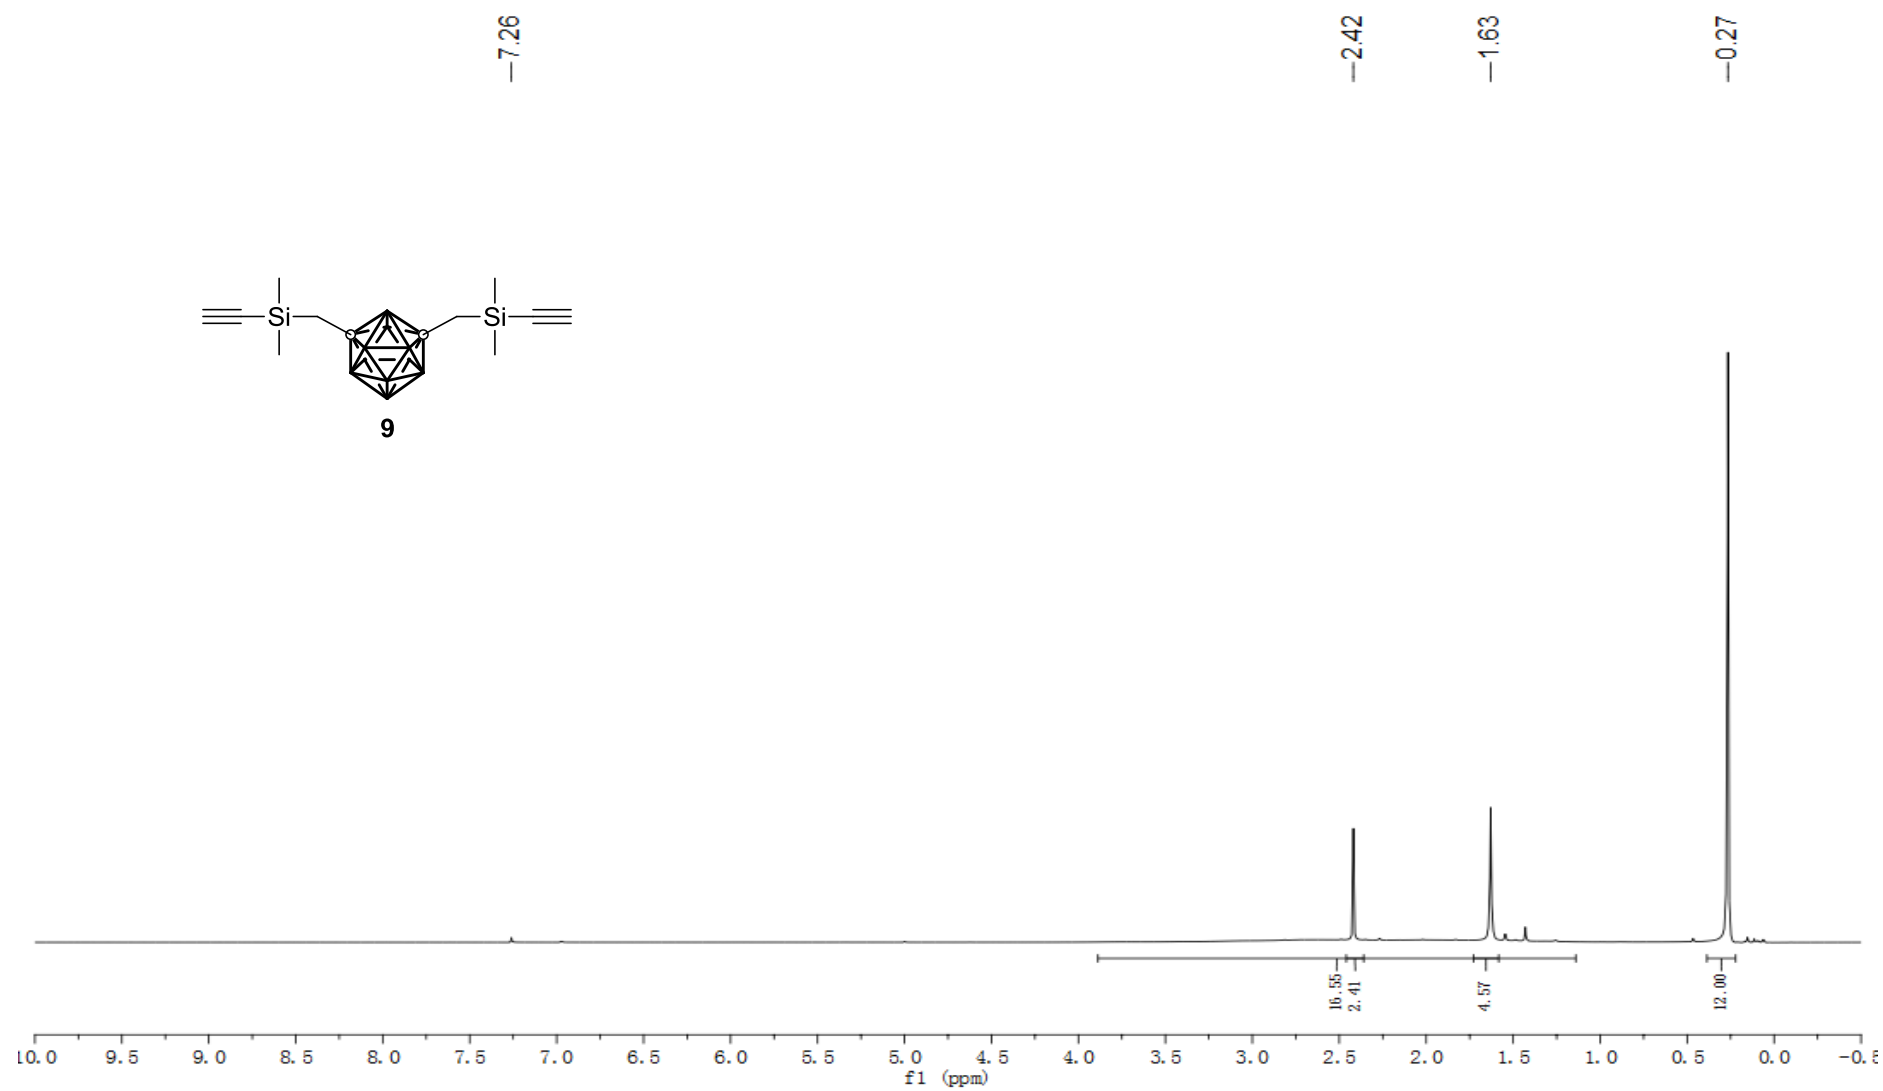

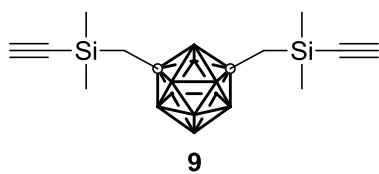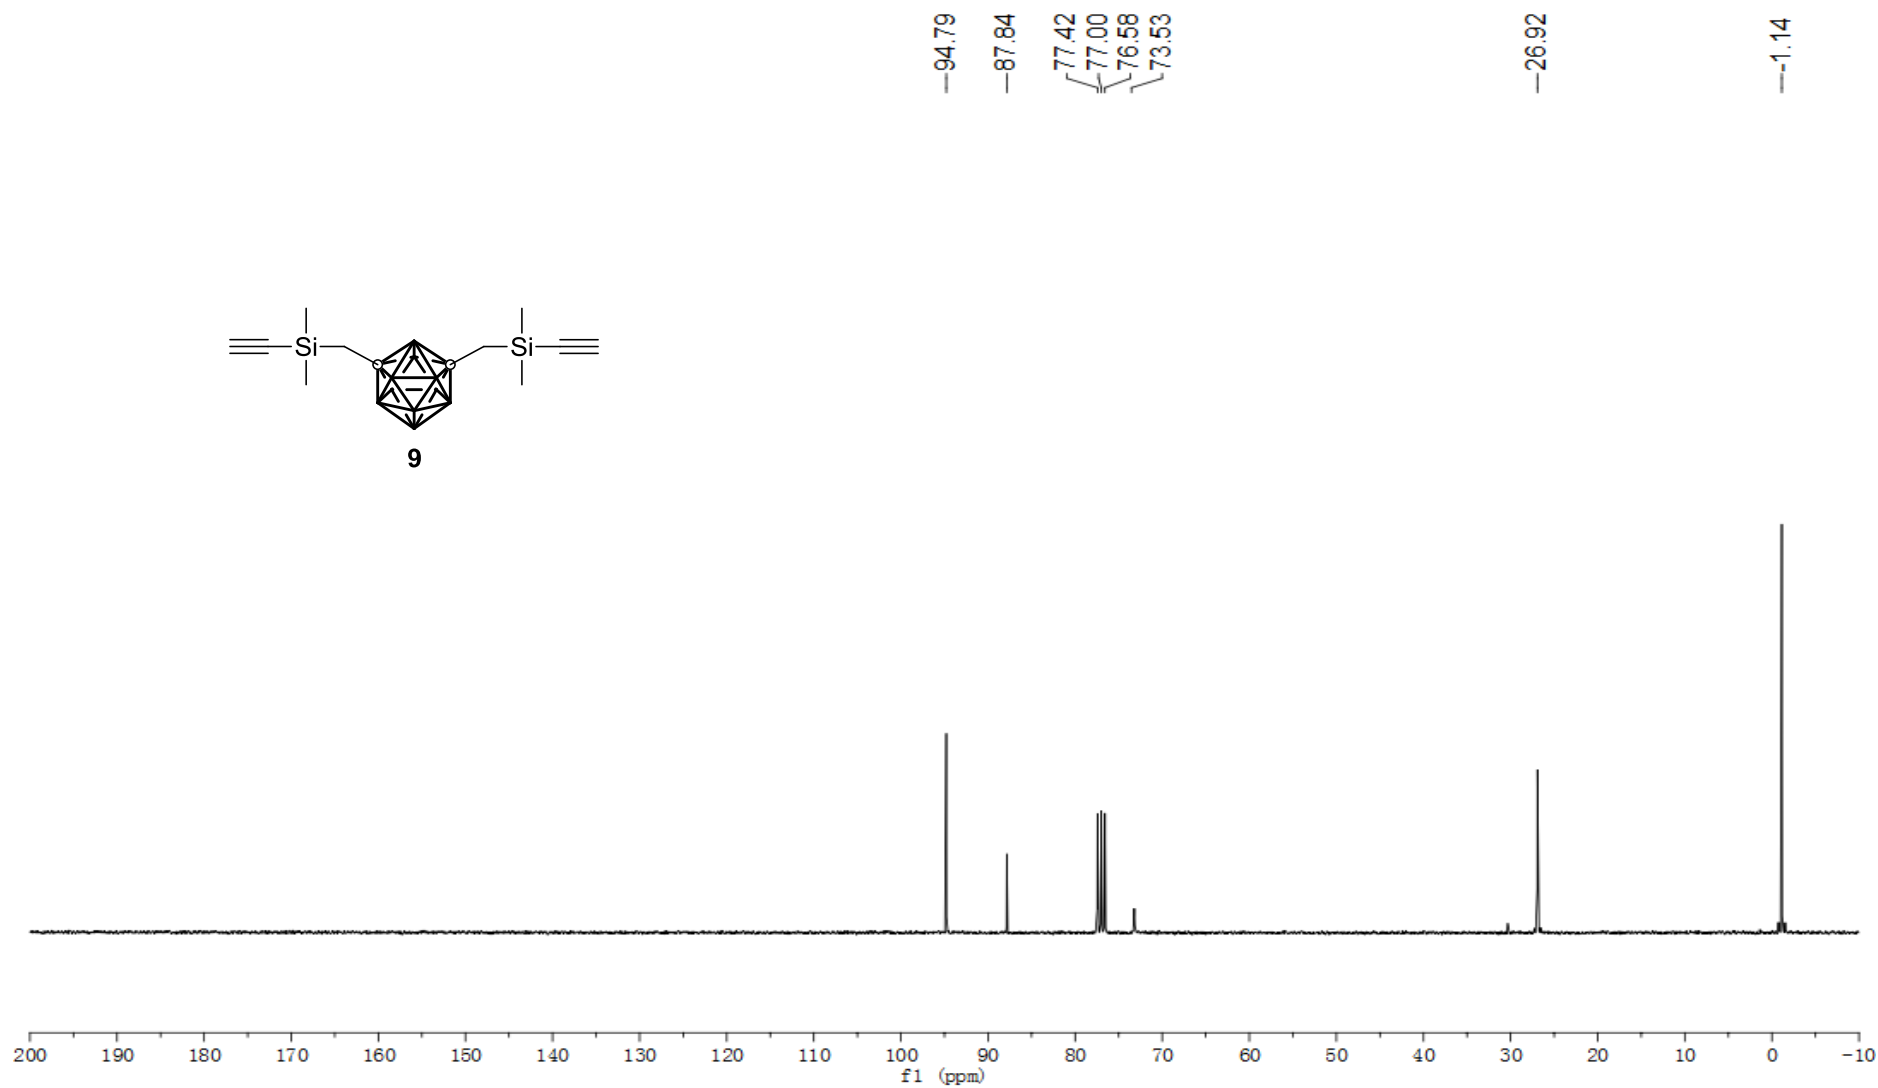

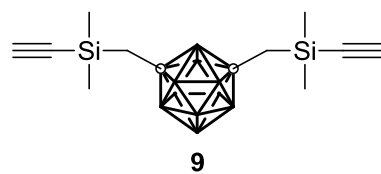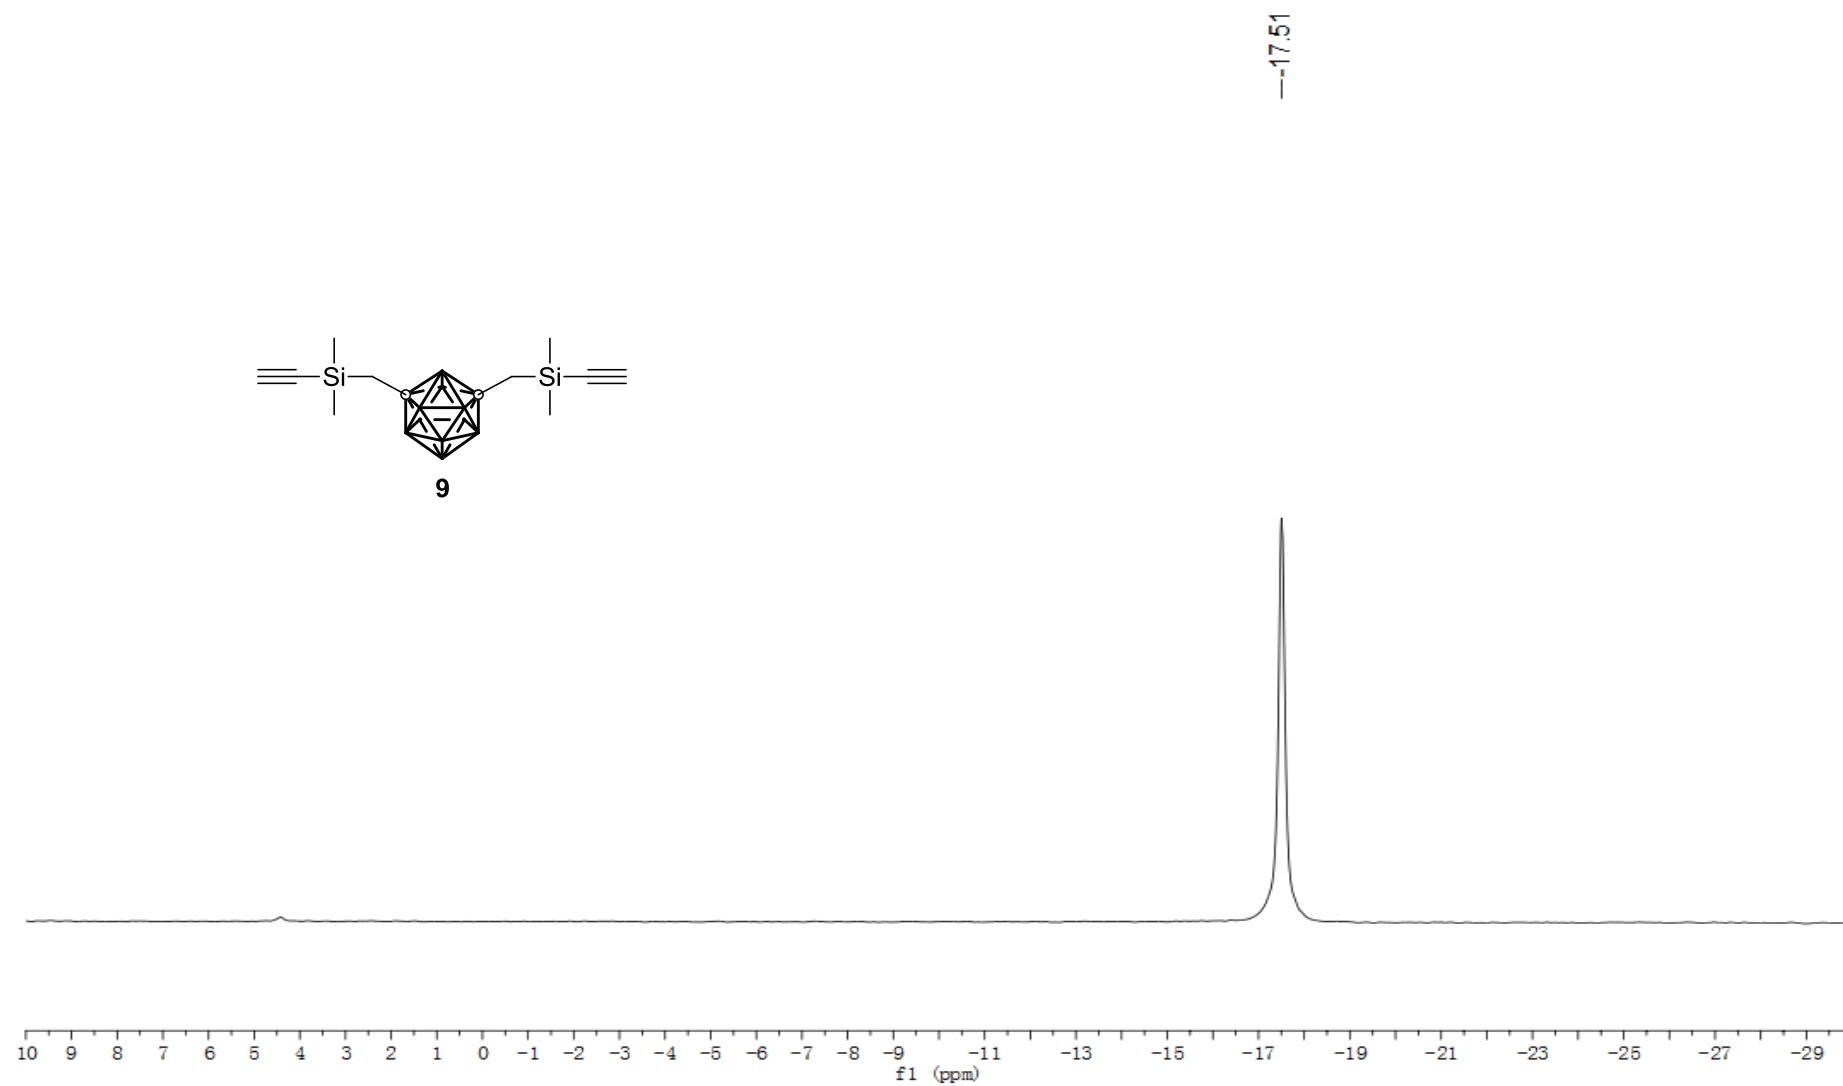

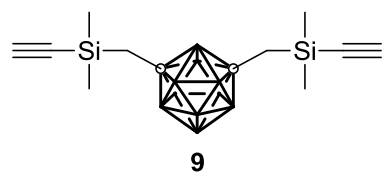

--6.18  
 --7.15  
 ~-9.20  
 ~-9.81  
 ~-10.20  
 ~-10.64  
 ~-11.72

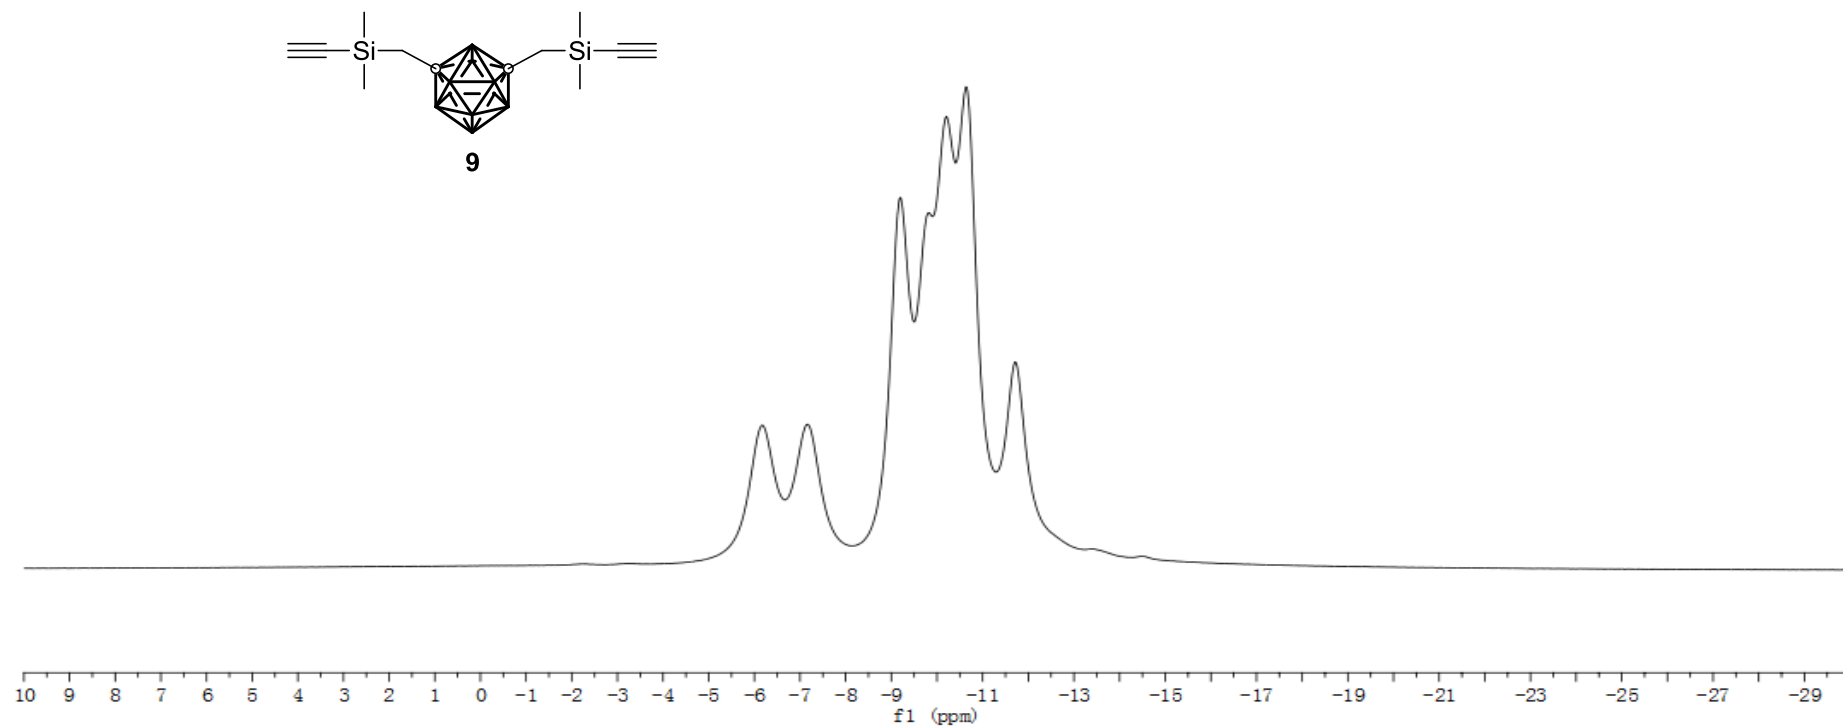

Supplement: c5ra13344k1.pdf [file c5ra13344k1.pdf]
